# Supplementary material for: Mild selective oxidative cleavage of lignin C–C bonds over a copper catalyst in water
Source: Royal Society of Chemistry journal article supplement (doi:10.1039/d1gc02102h), 2021-01-01
Supplement: d1gc02102h1.pdf [file d1gc02102h1.pdf]

## Electronic Supplementary information for

### Mild selective oxidative cleavage of lignin C-C bonds over copper catalyst in water

Yuzhen Hu,<sup>a,c</sup> Long Yan,<sup>a</sup> Xuelai Zhao,<sup>d</sup> Chenguang Wang,<sup>\*a,d</sup> Song Li,<sup>a,c</sup> Xinghua Zhang,<sup>a,b</sup>  
Longlong Ma<sup>a,b</sup> and Qi Zhang<sup>\*a,b</sup>

<sup>a</sup> Guangdong Provincial Key Laboratory of New and Renewable Energy Research and Development, CAS Key Laboratory of Renewable Energy, Guangzhou Institute of Energy Conversion, Chinese Academy of Sciences, Guangzhou 510640, PR China.

<sup>b</sup> Key Laboratory of Energy Thermal Conversion and Control of Ministry of Education, School of Energy and Environment, Southeast University, Nanjing 210096, PR China.

<sup>c</sup> University of Chinese Academy of Sciences, Beijing 100049, PR China

<sup>d</sup> Department of Thermal Science and Energy Engineering, University of Science and Technology of China, Hefei, 233022, PR China.

\*Corresponding Author: zhangqi@ms.giec.ac.cn, wangcg@ms.giec.ac.cn.

## Table of Contents

1. Chemicals and materials
2. Products analysis and calculation of yields
3. Synthesis and characterization of lignin models
4. Bond dissociation energies (BDEs) of model compounds calculated by density functional theory (DFT)
5. Supplementary experimental results

### 1. Chemicals and materials

CuCl (99.95%), CuBr (98%), Cu<sub>2</sub>O (99%), CuCl<sub>2</sub> (99%), CuO (99%), Cu(OAc)<sub>2</sub> (98%), Cu(OH)<sub>2</sub> (94%), CuSO<sub>4</sub> (99%), FeCl<sub>3</sub> (99%), MnCl<sub>2</sub> (99%), AlCl<sub>3</sub> (97%), ZnCl<sub>2</sub>

(98%), NaOH (98%), KOH (95%), Na<sub>2</sub>CO<sub>3</sub> (99%), K<sub>2</sub>CO<sub>3</sub> (99%), CsCO<sub>3</sub> (99%), NH<sub>3</sub>·H<sub>2</sub>O (25-28%) and NaOAc (99%) were all purchased from Meryer (Shanghai) Co., Ltd. Dichloromethane (99%), hydrochloric acid (37%), anhydrous Na<sub>2</sub>SO<sub>4</sub> (99%), 1,2-Diphenylethanone (98%), Diphenylethanedione (98%), 2-Hydroxy-1-phenylethanone (98%), phenyl formate (>97%), phenol (99.5%), 2-bromoacetophenone (99%), and acetone (99%) were all purchased from Shanghai Macklin Biochemical Co., Ltd. D<sub>2</sub>O (99.5%) and DMSO-d<sub>6</sub> (99.9%) were purchased from Shanghai Aladdin Biochemical Technology Co., Ltd. All analytical reagent chemicals were used as received without further purification.

Corn stover was obtained from Mengcheng City, Anhui Province of China. Pine wood, eucalyptus wood, bagasse and bamboo were produced in South China. Compositional analysis of these samples was performed based on NREL's Laboratory Analytical Procedure (see Table S3).<sup>1</sup>

## **2. Products analysis and calculation of yields**

### **2.1 Products analysis**

The aromatic products were characterized and quantified using gas chromatography/mass spectrometer (GC-MS, Agilent 7890A-5975C) and gas chromatography (GC, Shimadzu GC-2010 Pro). A 1 μL injection volume was used through a 30 m × 250 μm × 0.25 μm column (Rtx-SH-5) with a split ratio of 30:1. An inlet temperature of 280 °C and an oven temperature of 80 °C with a 10 °C min<sup>-1</sup> ramp to 280 °C was used with an overall run time of 32 min. <sup>1</sup>H, <sup>13</sup>C nuclear magnetic resonance (NMR) and two-dimensional heteronuclear single quantum coherence nuclear magnetic resonance (2D HSQC-NMR) spectra were obtained using a Bruker AVANCE III 400 MHz spectrometer at room temperature. Fourier transformation infrared (FT-IR) spectra was recorded by a Thermo Scientific Nicolet 6700 spectrometer. Solid sample was diluted with KBr and pressed into disc before FT-IR test.

## 2.2 Calculation of the conversion of lignin (models) and yield of products

Calculation of the conversion of lignin models (**a** represents  $\beta$ -O-4 models and **b** represents  $\beta$ -1 models) and yield of products (**c** represents benzoic acid and its derivatives; **d** represents phenol and its derivatives; **e** represents benzaldehyde and its derivatives):

$$\text{Conversion of model a (\%)} = \frac{\text{Moles of reacted model a}}{\text{Moles of added a}} \times 100\%$$

$$\text{Conversion of model b (\%)} = \frac{\text{Moles of reacted model b}}{\text{Moles of added b}} \times 100\%$$

$$\text{Yield of product c (\%)} = \frac{\text{Moles of formed c}}{\text{Moles of added model}} \times 100\%$$

$$\text{Yield of product d (\%)} = \frac{\text{Moles of formed d}}{\text{Moles of added model}} \times 100\%$$

$$\text{Yield of product e (\%)} = \frac{\text{Moles of formed e}}{\text{Moles of added model}} \times 100\%$$

Calculation of the yield of aromatic compounds from authentic lignin:

$$\text{Yield of aromatic monomer (wt\%)} = \frac{\text{Mass of formed aromatic monomer}}{\text{Mass of starting lignin}} \times 100 \text{ wt\%}$$

$$\text{Vanillin Selectivity (\%)} = \frac{\text{Mass of Vanillin}}{\text{Mass of aromatic monomers}} \times 100\%$$

$$\text{Syringaldehyde Selectivity (\%)} = \frac{\text{Mass of Syringaldehyde}}{\text{Mass of aromatic monomers}} \times 100\%$$

## 3. Synthesis and characterization of lignin models

### Preparation of 2-phenoxy-1-phenylethanone (**1a**)

2-Phenoxy-1-phenylethanone was prepared by reference.<sup>2</sup> To a solution of phenol (2.4 g, 25 mmol) and  $\text{K}_2\text{CO}_3$  (3.5 g, 25 mmol) in acetone (50 mL) was added 2-bromoacetophenone (4.7g, 23 mmol) with Ar atmosphere protection and was stirred at RT for 16 h. After reaction, the suspension was filtered and concentrated in vacuum. The solid was dissolved in ethyl acetate and washed with NaOH aqueous and water successively. The organic phase was then dried by anhydrous  $\text{Na}_2\text{SO}_4$ . The crude product was recrystallized from ethanol to give 2-phenoxy-1-phenylethanone as a white

solid in 78% yield. For the other methoxy substituted  $\beta$ -O-4 compounds, the procedures are the same as described above, except that different starting materials were used.

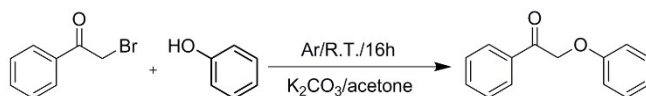

### Procedure for the preparation of deuterium labelled 1a-d<sub>2</sub>

The deuterated compound (Model 1a-d<sub>2</sub>) was synthesized according to following procedure: 2-phenoxy-1-phenylethanone (1.1 g, 5.0 mmol) and anhydrous  $K_2CO_3$  (0.1 g, 0.5 mmol) were added into  $D_2O$  (10 mL) in a 25 mL round bottom flask under argon atmosphere. The mixture was refluxed in an oil bath at 100 °C for 12 h. After cooling down to room temperature, the solvent was replaced by fresh  $D_2O$  under argon atmosphere, and further refluxed at 100 °C for another 12 h. Then the obtained solid was washed to remove  $K_2CO_3$  residues. Finally, the solid was dried under vacuum to give a deuterated compound as a light yellow solid.

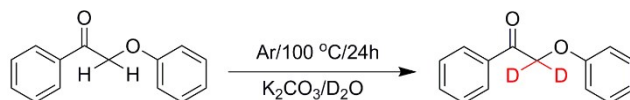

The structures of these compounds are confirmed by  $^1H$  NMR (Fig. S1-S6).

### $^1H$ NMR and $^{13}C$ NMR:

Model 1a: 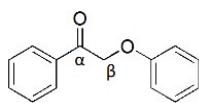 2-phenoxy-1-phenylethanone.

White solid.  $^1H$  NMR (400 MHz,  $DMSO-d_6$ )  $\delta$  8.03-8.05 (t,  $J = 7.3$  Hz, 2H), 7.68-7.72 (t,  $J = 7.4$  Hz, 1H), 7.56-7.60 (t,  $J = 7.7$  Hz, 2H), 7.26-7.32 (m, 2H), 6.93-6.99 (m, 3H), 5.58 (s, 2H).  $^{13}C$  NMR (101 MHz,  $DMSO-d_6$ )  $\delta = 195.11, 158.39, 134.90, 134.25, 129.89, 129.31, 128.34, 121.34, 115.08, 70.50$ .

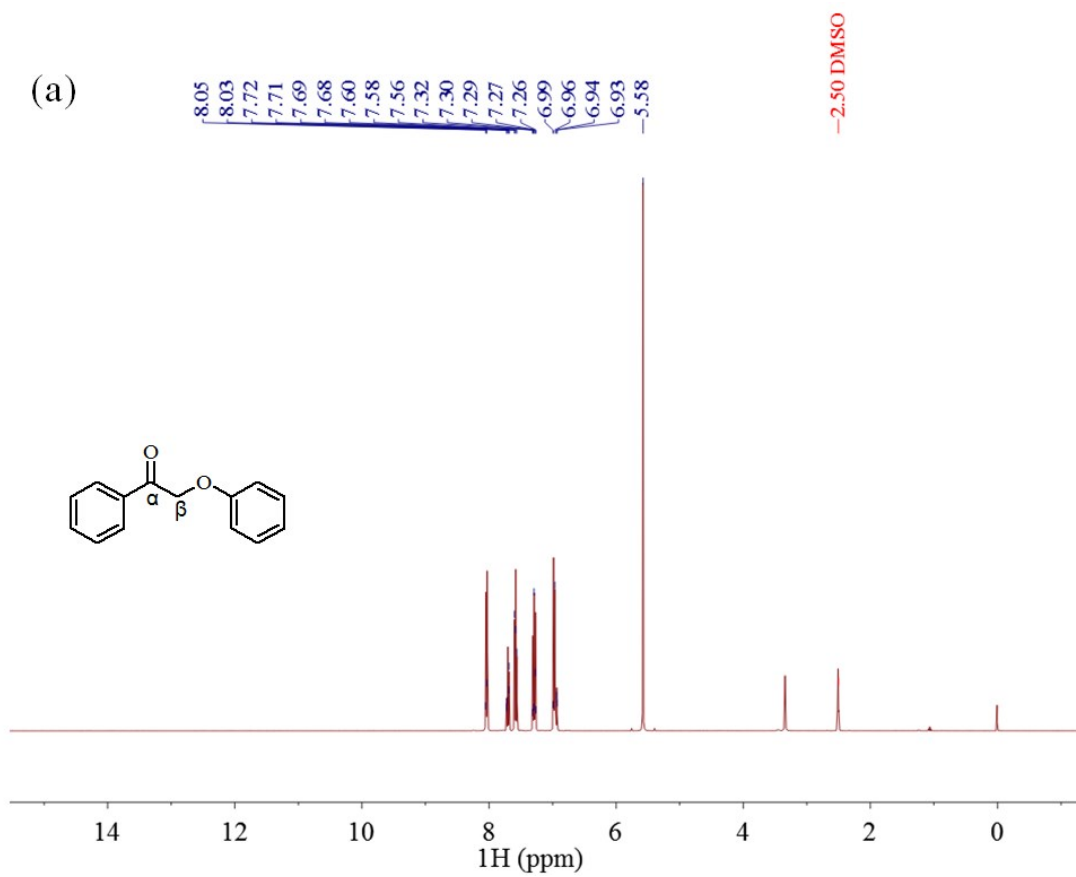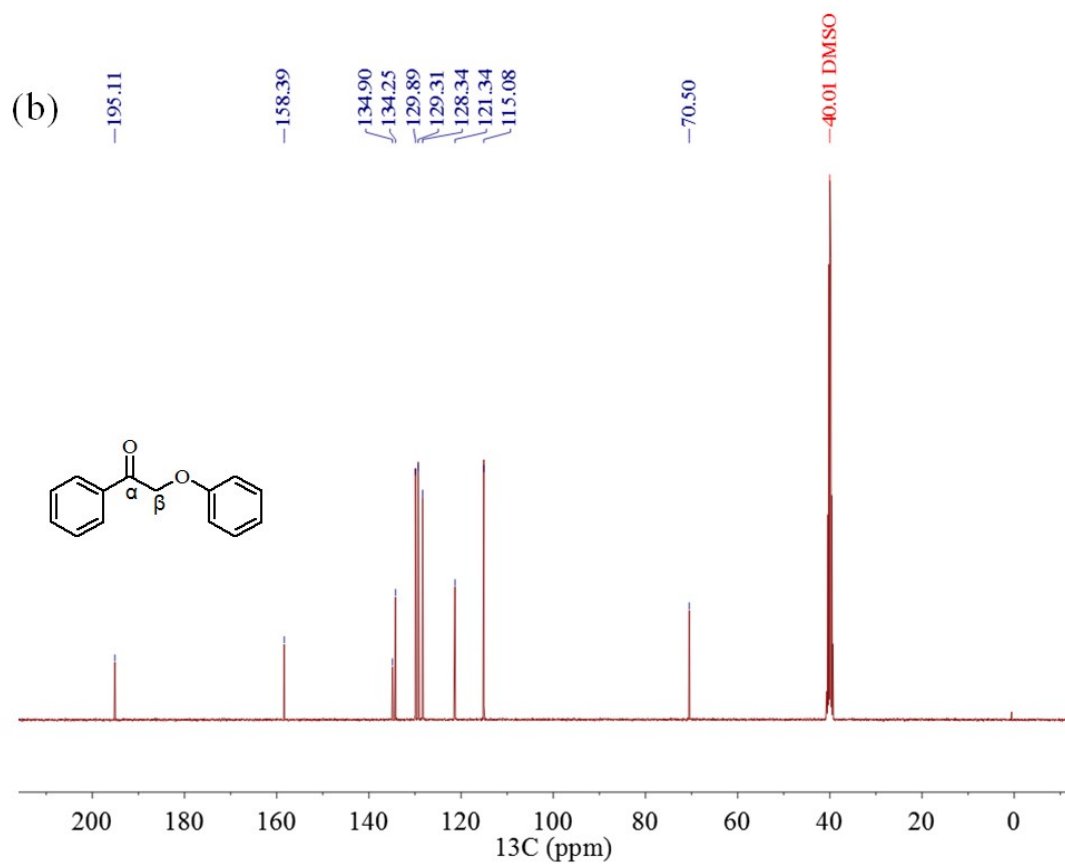

Fig. S1  $^1\text{H}$  NMR and  $^{13}\text{C}$  NMR spectra of model 1a

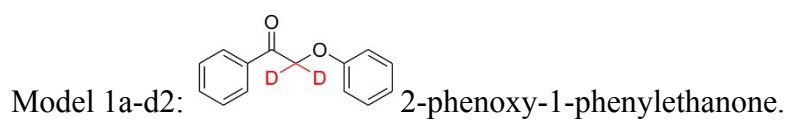

Light yellow solid.  $^1\text{H}$  NMR (400 MHz,  $\text{DMSO-d}_6$ )  $\delta$  8.03-8.06 (t,  $J = 7.3$  Hz, 2H), 7.68-7.73 (t,  $J = 7.4$  Hz, 1H), 7.56-7.60 (t,  $J = 7.7$  Hz, 2H), 7.26-7.31 (m, 2H), 6.93-6.99 (m, 3H).  $^{13}\text{C}$  NMR (101 MHz,  $\text{DMSO-d}_6$ )  $\delta = 195.21, 158.39, 134.91, 134.26, 129.89, 129.31, 128.35, 121.32, 115.07$ .

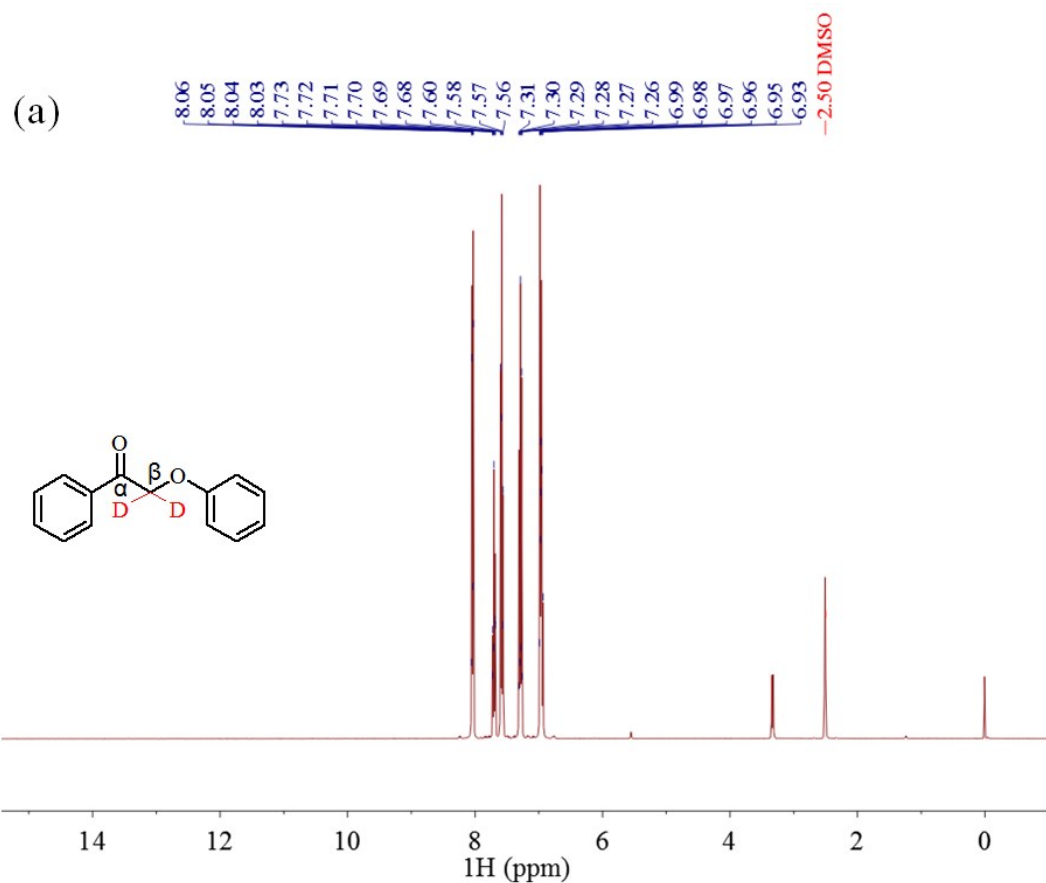

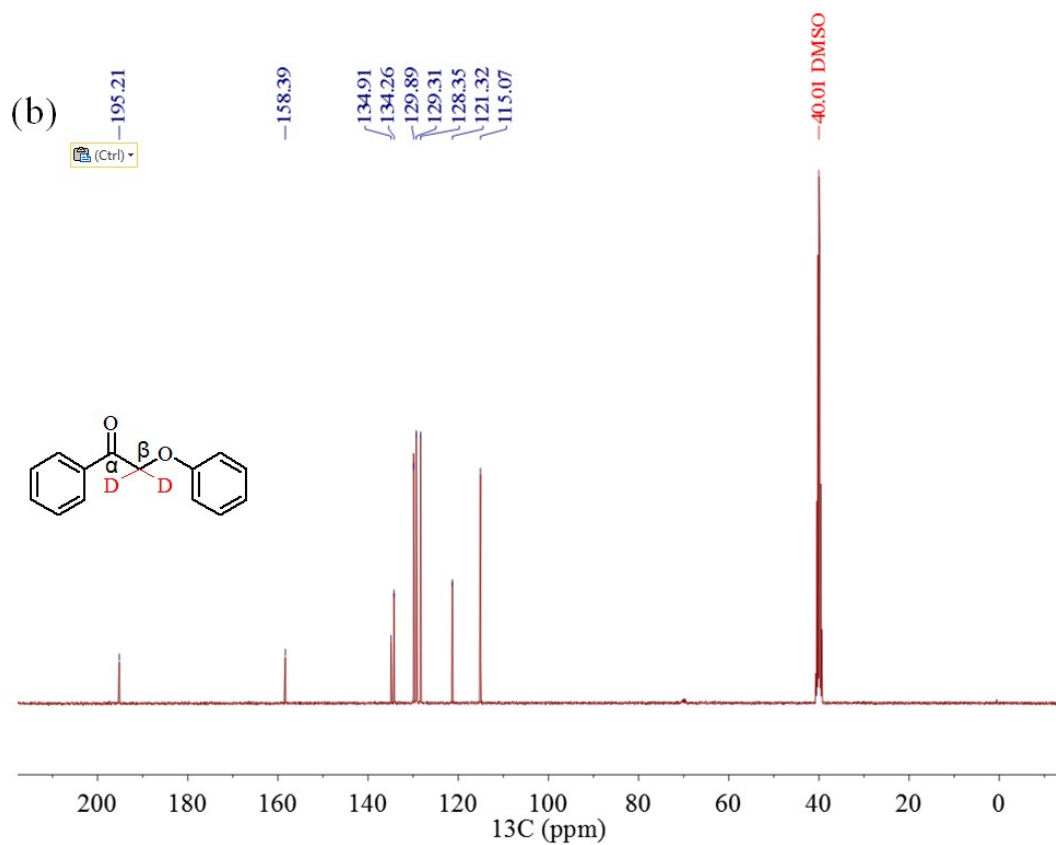

Fig. S2  $^1\text{H}$  NMR and  $^{13}\text{C}$  NMR spectra of model 1a- $\text{d}_2$

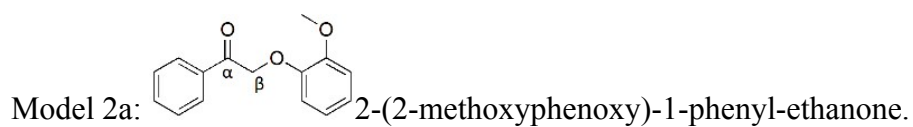

White solid.  $^1\text{H}$  NMR (400 MHz,  $\text{DMSO-d}_6$ )  $\delta$  8.03-8.04 (t,  $J = 7.4$  Hz, 2H), 7.68-7.72 (t,  $J = 7.4$  Hz, 1H), 7.55-7.59 (t,  $J = 7.8$  Hz, 2H), 6.89-7.01 (m, 2H), 6.81-6.85 (m, 3H), 5.54 (s, 2H), 3.79 (s, 3H).  $^{13}\text{C}$  NMR (101 MHz,  $\text{DMSO-d}_6$ )  $\delta = 195.20, 149.47, 147.91, 134.94, 134.21, 129.29, 128.36, 121.84, 121.02, 114.21, 112.96, 71.23, 56.03$ .

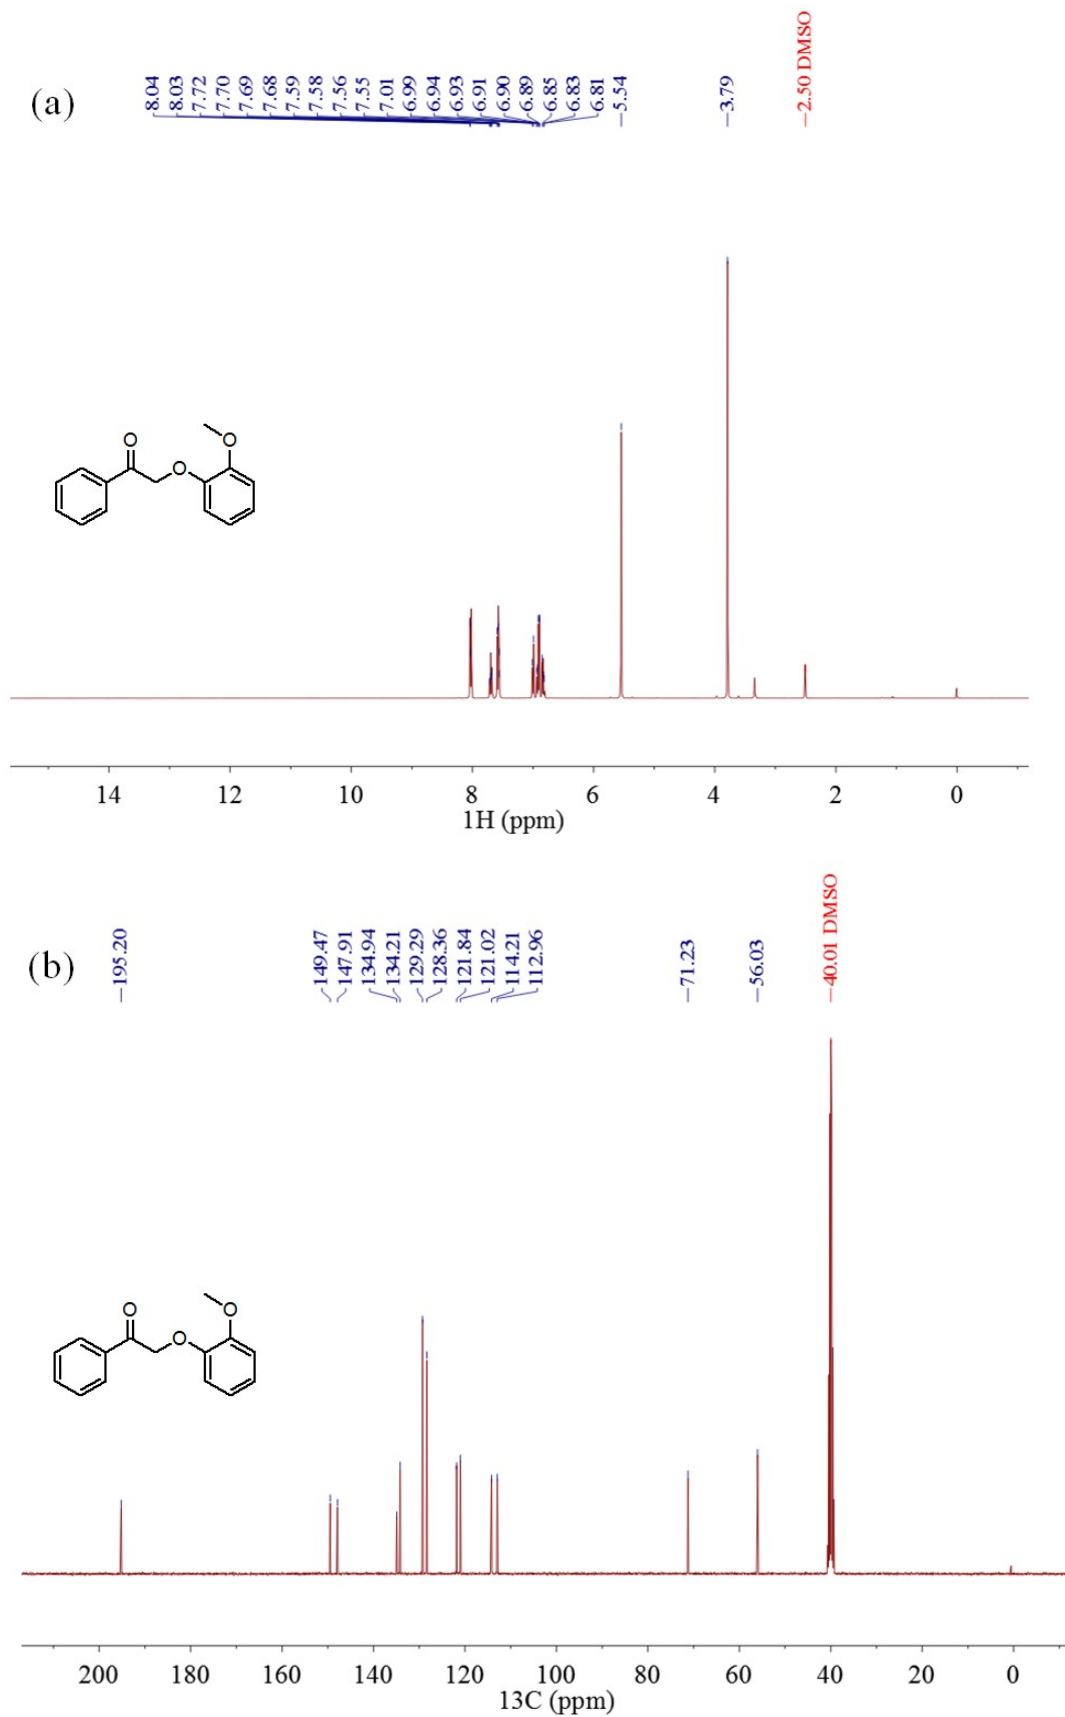

Fig. S3  $^1\text{H}$  NMR and  $^{13}\text{C}$  NMR spectra of model 2a



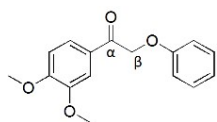

Model 3a: 1-(3,4-dimethoxyphenyl)-2-phenoxyethanone.

Light yellow solid.  $^1\text{H}$  NMR (400 MHz, DMSO- $d_6$ )  $\delta$  = 7.72-7.74 (dd,  $J$  = 8.4 Hz, 1.9, 1H), 7.50 (d,  $J$  = 1.9 Hz, 1H), 7.26-7.31 (m, 2H), 6.93 –7.12(m, 4H), 5.51 (s, 2H), 3.84-3.87(d,  $J$  = 8.5 Hz, 6H).

$^{13}\text{C}$  NMR (101 MHz, DMSO- $d_6$ )  $\delta$  = 193.47, 158.48, 154.02, 149.19, 129.87, 127.72, 123.07, 121.27, 115.09, 111.50, 110.63, 70.24, 56.30, 56.06.

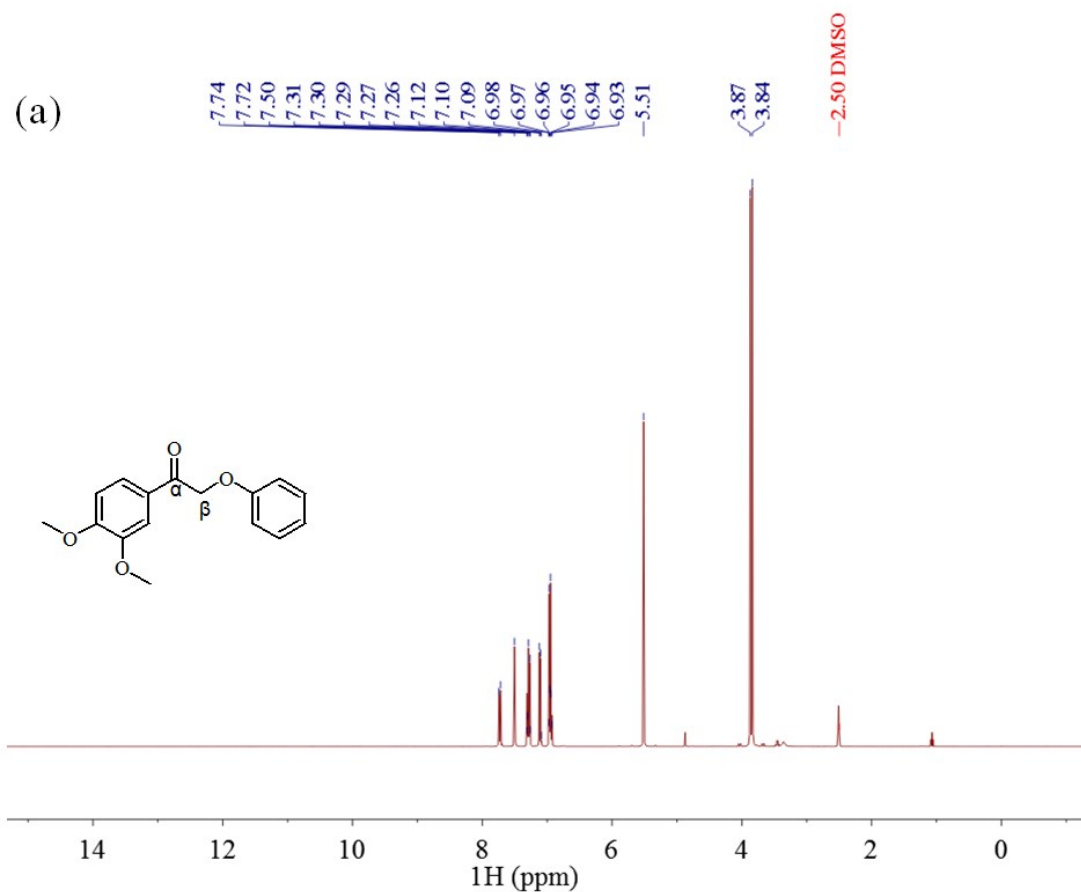

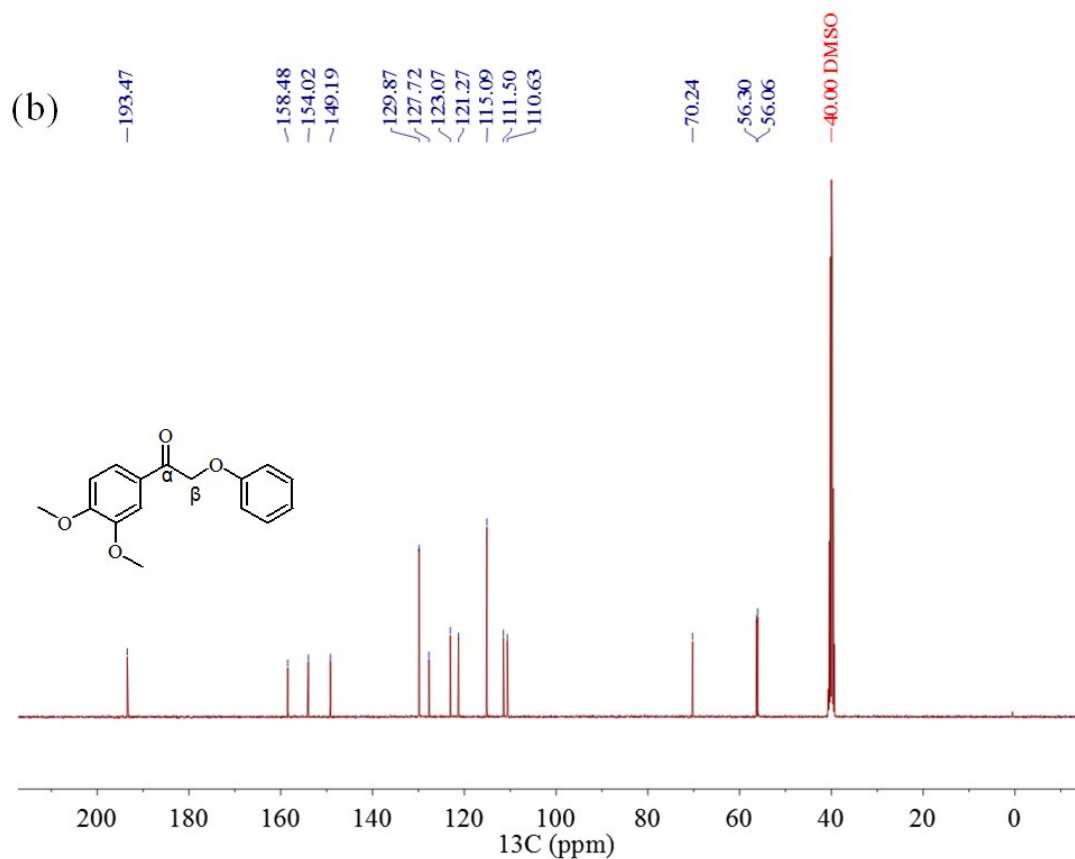

**Fig. S4**  $^1\text{H}$  NMR and  $^{13}\text{C}$  NMR spectra of model 3a

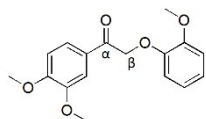

**Model 4a:**

1-(3,4-dimethoxyphenyl)-2-(2-methoxyphenoxy)ethanone.

White solid.  $^1\text{H}$  NMR (400 MHz, DMSO- $d_6$ )  $\delta$  7.72 (d,  $J = 8.4$  Hz, 1H), 7.51 (d,  $J = 2.0$  Hz, 1H), 7.11 (d,  $J = 8.5$  Hz, 1H), 6.99 (dd,  $J = 8.0, 1.5$  Hz, 2H), 6.96 – 6.78 (m, 2H), 5.47 (s, 2H), 3.85 (d,  $J = 12.6$  Hz, 9H).  $^{13}\text{C}$  NMR (101 MHz, DMSO- $d_6$ )  $\delta = 193.58, 153.99, 149.46, 149.16, 147.99, 127.76, 123.08, 121.78, 121.00, 114.15, 112.95, 111.48, 110.70, 71.01, 56.29, 56.03$ .

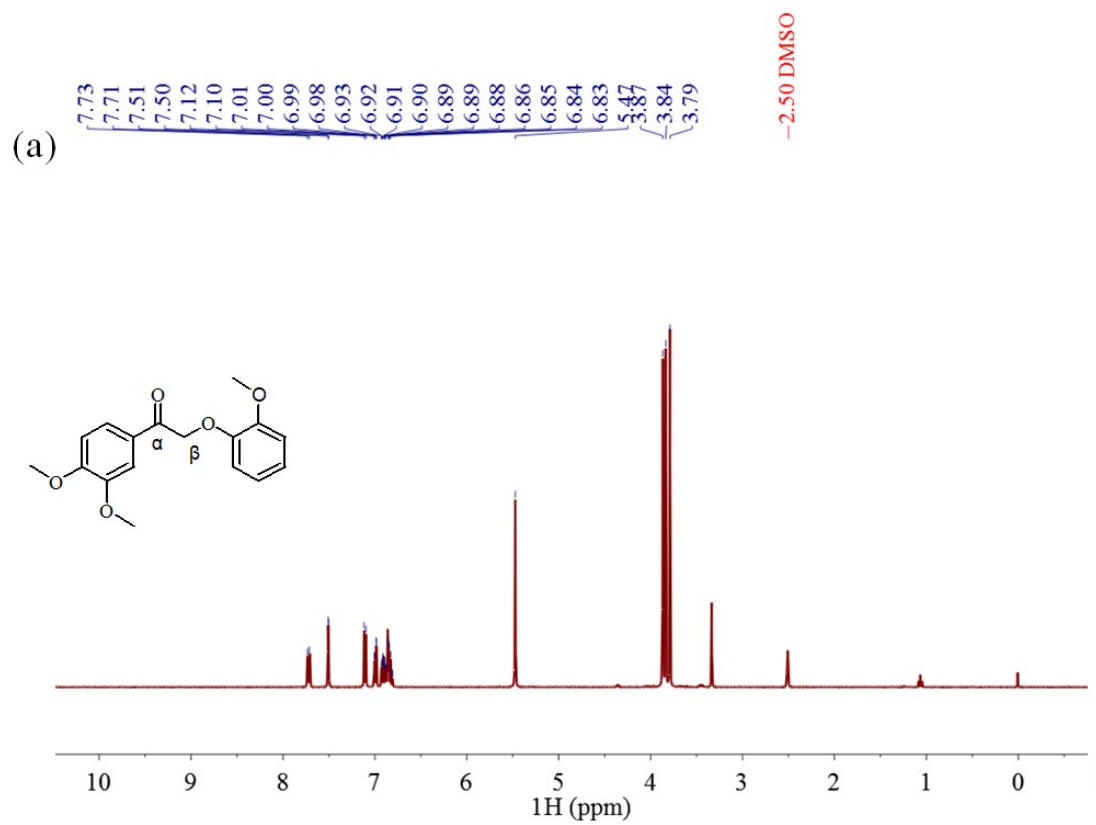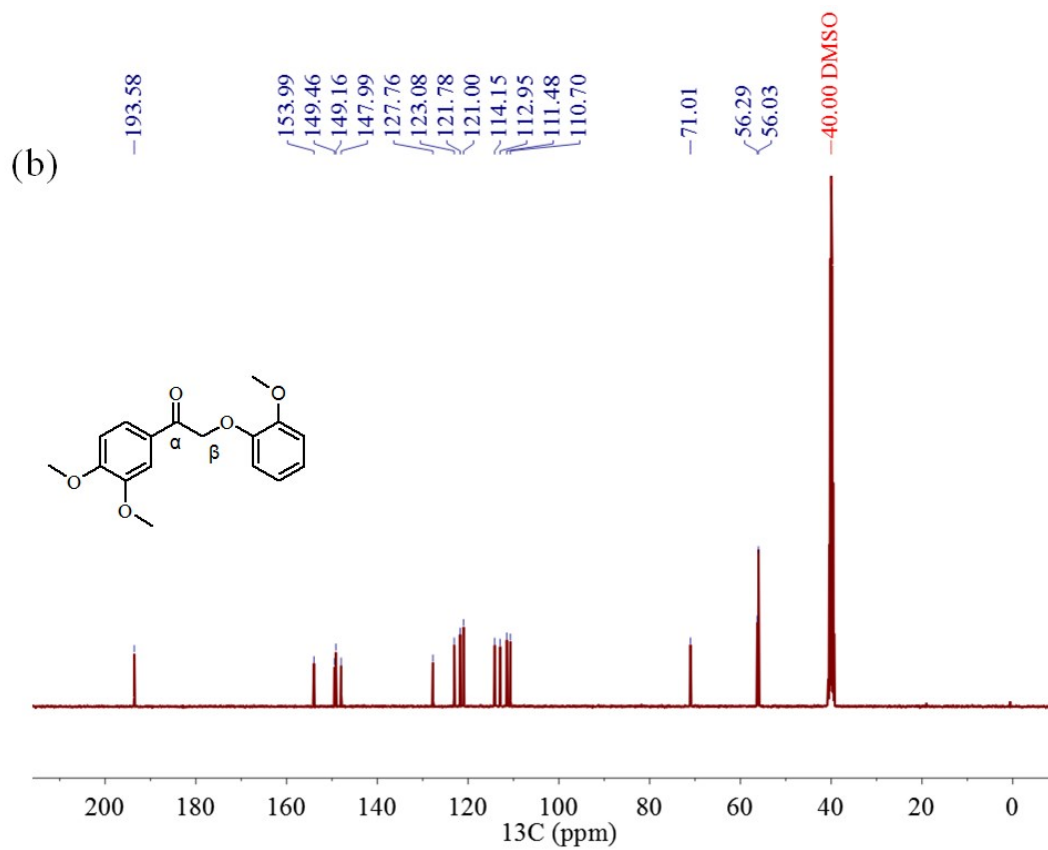

Fig. S5  $^1\text{H}$  NMR and  $^{13}\text{C}$  NMR spectra of model 4a

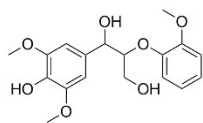

Model 5a:

1-(4-Hydroxy-3,5-dimethoxyphenyl)-2-(2-methoxyphenoxy) propane-1,3-diol

Light yellow solid.  $^1\text{H}$  NMR (400 MHz,  $\text{DMSO-d}_6$ )  $\delta$  = 8.11 (s, 1H), 6.99 (dd,  $J=7.4, 2.2$  Hz, 5H), 6.99-6.75 (m, 3H), 6.68(s, 2H), 5.33 (d,  $J=4.7$  Hz, 1H), 4.71(t,  $J=5.0$  Hz, 1H), 4.60(t,  $J=5.6$  Hz, 1H), 4.33 (q,  $J=5.0$  Hz, 1H), 3.72 (d,  $J=5.2$  Hz, 9H), 3.63 (t,  $J=5.6$  Hz, 2H).  $^{13}\text{C}$  NMR (101MHz,  $\text{DMSO-d}_6$ )  $\delta$  = 150.16, 148.58, 147.85, 134.94, 132.84, 121.34, 121.11, 116.15, 113.10, 105.26, 83.93, 72.38, 60.67, 56.35.

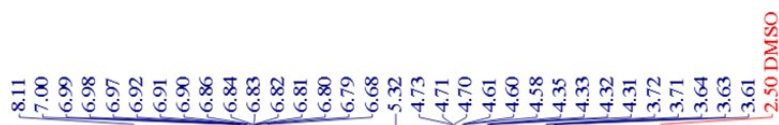

(a)

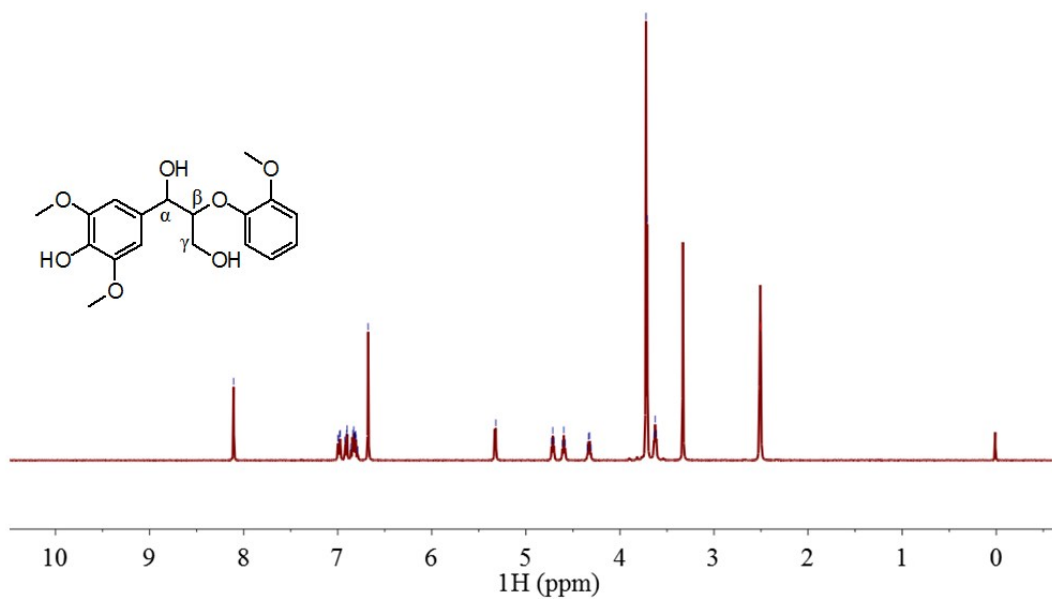

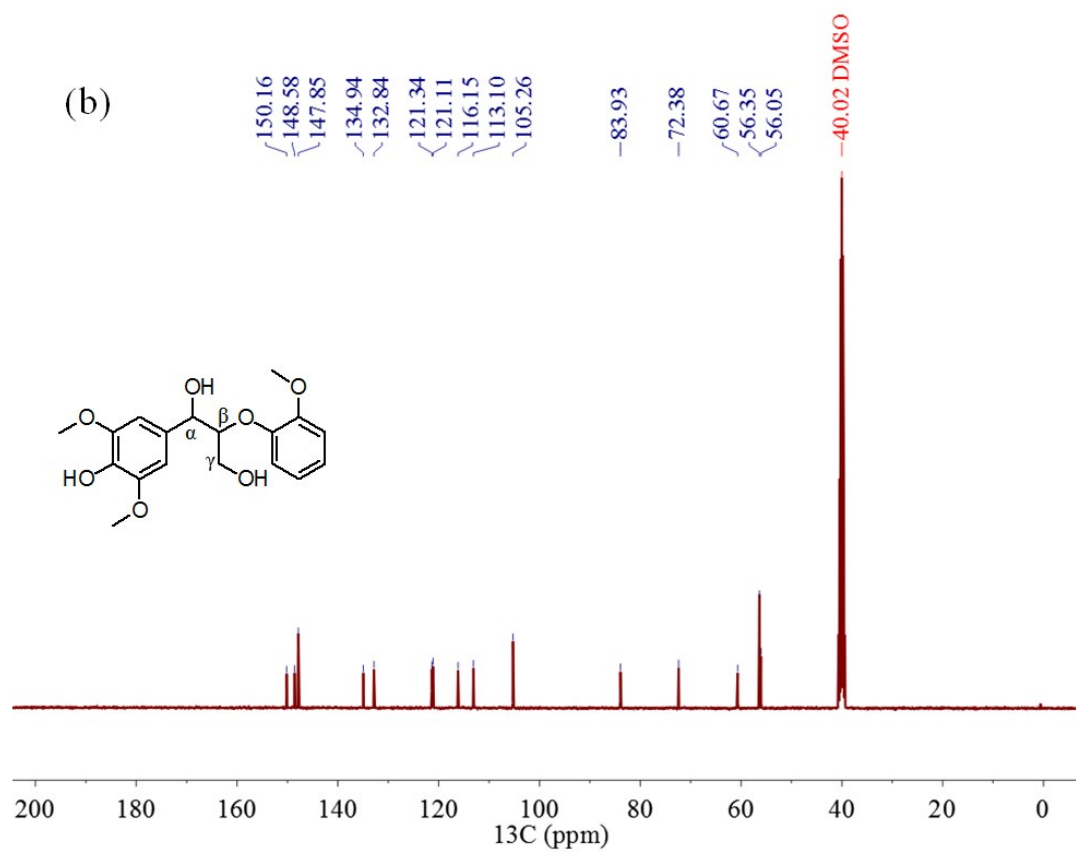

Fig. S6 <sup>1</sup>H NMR and <sup>13</sup>C NMR spectra of model 5a

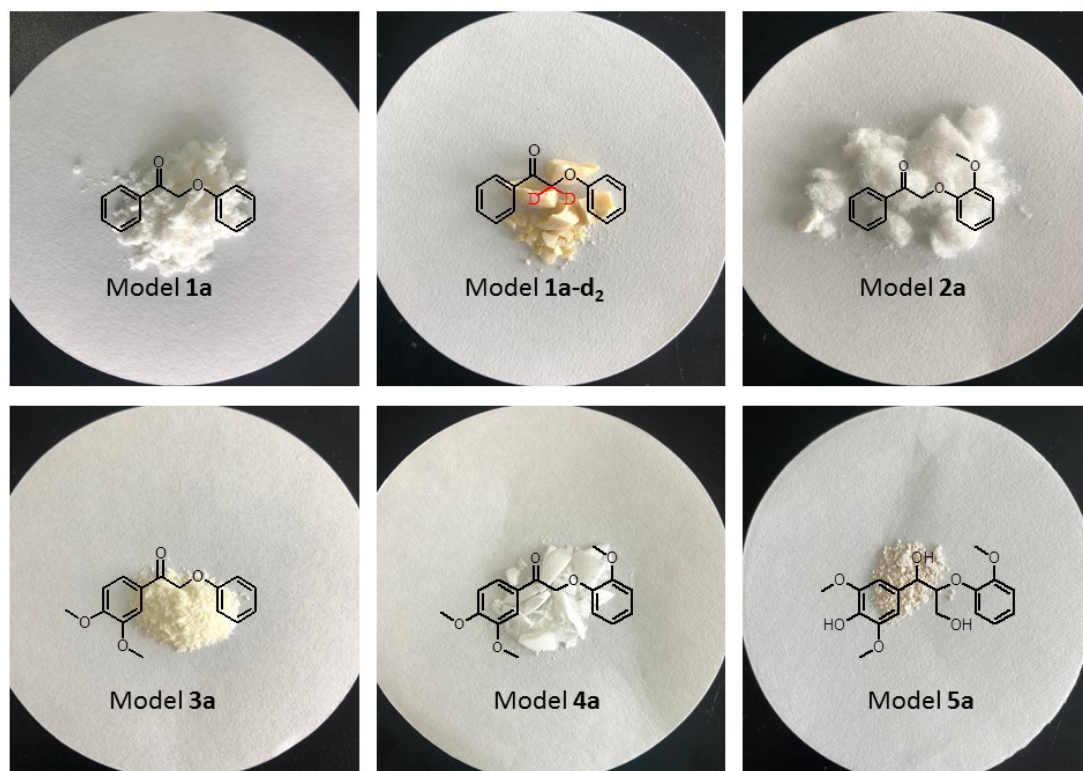

Fig. S7 The synthesized  $\beta$ -O-4 model compounds.

#### 4. Bond dissociation energies (BDEs) of $\beta$ -O-4 model compounds calculated by density functional theory (DFT)

BDEs were obtained as the difference of the sum of the energies of the dissociated product fragments and the energy of the molecule.

$$\text{BDE} = (E_{\text{Frag1}} + E_{\text{Frag2}}) - E_{\text{Mol}} \quad (1)$$

where  $E_{\text{Mol}}$  is the total energy of the molecule,  $E_{\text{Frag1}}$  and  $E_{\text{Frag2}}$  are energies of the dissociated products through the selected linkage (either the C-O or C-C linkage). All dissociated fragments were fully optimized.

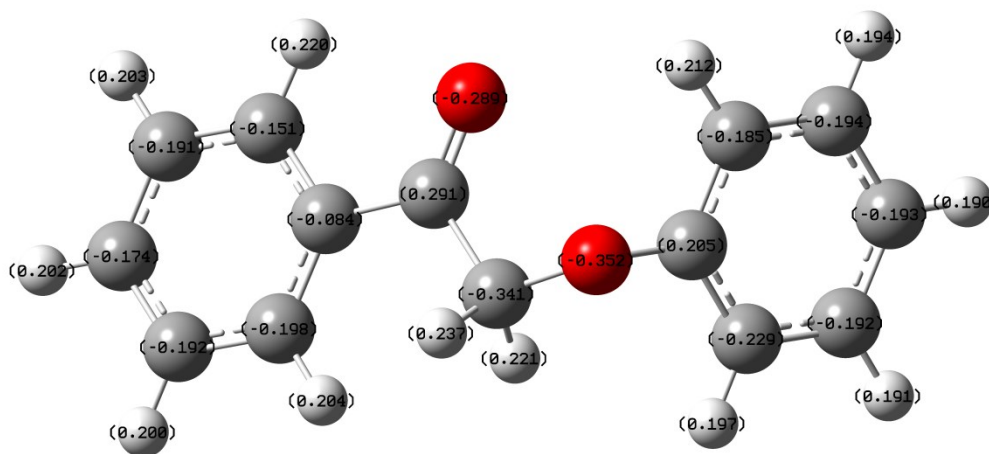

Fig. S8 Optimized structure and Charge distribution of model 1a.

Standard orientation:

| Center Number | Atomic Number | Atomic Type | Coordinates (Angstroms) |           |           |
|---------------|---------------|-------------|-------------------------|-----------|-----------|
|               |               |             | X                       | Y         | Z         |
| 1             | 6             | 0           | -3.995225               | -1.304849 | -0.431142 |
| 2             | 6             | 0           | -2.694516               | -1.147097 | 0.037367  |
| 3             | 6             | 0           | -2.131487               | 0.130777  | 0.143863  |
| 4             | 6             | 0           | -2.893480               | 1.245296  | -0.227425 |
| 5             | 6             | 0           | -4.190174               | 1.087167  | -0.696105 |
| 6             | 6             | 0           | -4.743869               | -0.189369 | -0.798308 |
| 7             | 1             | 0           | -4.424240               | -2.297917 | -0.509687 |
| 8             | 1             | 0           | -2.129135               | -2.027688 | 0.318975  |
| 9             | 1             | 0           | -2.442505               | 2.226170  | -0.137543 |
| 10            | 1             | 0           | -4.772605               | 1.956359  | -0.982137 |

|    |   |   |           |           |           |
|----|---|---|-----------|-----------|-----------|
| 11 | 1 | 0 | -5.757707 | -0.314063 | -1.163838 |
| 12 | 6 | 0 | -0.743423 | 0.366637  | 0.648995  |
| 13 | 6 | 0 | 0.087472  | -0.860950 | 1.040627  |
| 14 | 1 | 0 | 0.149696  | -1.545209 | 0.185133  |
| 15 | 1 | 0 | -0.419880 | -1.393863 | 1.849793  |
| 16 | 6 | 0 | 2.332679  | -0.270388 | 0.561823  |
| 17 | 6 | 0 | 2.822213  | 1.024399  | 0.418554  |
| 18 | 6 | 0 | 2.851812  | -1.313132 | -0.203822 |
| 19 | 6 | 0 | 3.842239  | 1.272452  | -0.495466 |
| 20 | 1 | 0 | 2.380896  | 1.812928  | 1.013349  |
| 21 | 6 | 0 | 3.864823  | -1.053829 | -1.123923 |
| 22 | 1 | 0 | 2.479303  | -2.321905 | -0.058861 |
| 23 | 6 | 0 | 4.362831  | 0.238555  | -1.272176 |
| 24 | 1 | 0 | 4.224982  | 2.281479  | -0.607930 |
| 25 | 1 | 0 | 4.272141  | -1.866384 | -1.716566 |
| 26 | 1 | 0 | 5.155183  | 0.438230  | -1.985533 |
| 27 | 8 | 0 | 1.367312  | -0.521321 | 1.521675  |
| 28 | 8 | 0 | -0.285749 | 1.483552  | 0.750533  |

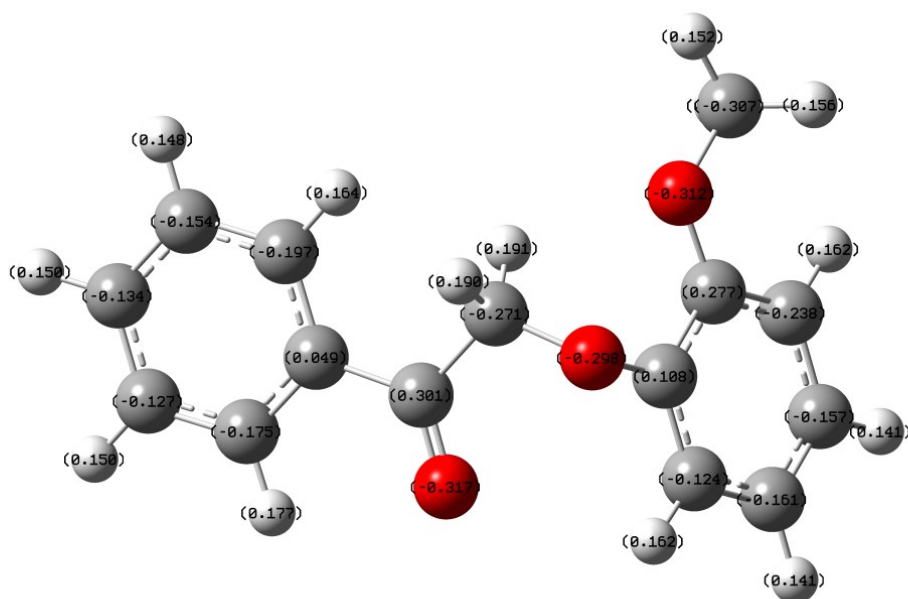

**Fig. S9 Optimized structure and Charge distribution of model 2a.**

Standard orientation:

| Center<br>Number | Atomic<br>Number | Atomic<br>Type | Coordinates (Angstroms) |   |   |
|------------------|------------------|----------------|-------------------------|---|---|
|                  |                  |                | X                       | Y | Z |

---

|    |   |   |           |           |           |
|----|---|---|-----------|-----------|-----------|
| 1  | 6 | 0 | 4.622562  | -0.793158 | 0.855606  |
| 2  | 6 | 0 | 3.367794  | -1.179923 | 0.406071  |
| 3  | 6 | 0 | 2.481708  | -0.235888 | -0.126767 |
| 4  | 6 | 0 | 2.877226  | 1.105429  | -0.200921 |
| 5  | 6 | 0 | 4.135917  | 1.492543  | 0.249244  |
| 6  | 6 | 0 | 5.009216  | 0.545168  | 0.777817  |
| 7  | 1 | 0 | 5.302187  | -1.531860 | 1.266886  |
| 8  | 1 | 0 | 3.045045  | -2.212907 | 0.455214  |
| 9  | 1 | 0 | 2.211987  | 1.857129  | -0.609383 |
| 10 | 1 | 0 | 4.434683  | 2.533497  | 0.188237  |
| 11 | 1 | 0 | 5.989933  | 0.848540  | 1.128988  |
| 12 | 6 | 0 | 1.145139  | -0.717274 | -0.600001 |
| 13 | 6 | 0 | 0.197803  | 0.316827  | -1.209012 |
| 14 | 1 | 0 | 0.656846  | 0.730124  | -2.111891 |
| 15 | 8 | 0 | -1.033875 | -0.243146 | -1.615479 |
| 16 | 6 | 0 | -1.957079 | -0.476308 | -0.619108 |
| 17 | 6 | 0 | -2.332677 | -1.780574 | -0.336373 |
| 18 | 6 | 0 | -2.576605 | 0.595359  | 0.052373  |
| 19 | 6 | 0 | -3.327970 | -2.043427 | 0.603765  |
| 20 | 1 | 0 | -1.816258 | -2.574121 | -0.860373 |
| 21 | 6 | 0 | -3.561832 | 0.328201  | 1.002725  |
| 22 | 6 | 0 | -3.935358 | -0.989078 | 1.273134  |
| 23 | 1 | 0 | -3.614136 | -3.067519 | 0.815727  |
| 24 | 1 | 0 | -4.049234 | 1.137970  | 1.530113  |
| 25 | 1 | 0 | -4.706806 | -1.179755 | 2.011502  |
| 26 | 8 | 0 | -2.150907 | 1.847968  | -0.293479 |
| 27 | 6 | 0 | -2.784089 | 2.958969  | 0.317645  |
| 28 | 1 | 0 | -3.857528 | 2.973153  | 0.102975  |
| 29 | 1 | 0 | -2.631534 | 2.962957  | 1.402289  |
| 30 | 1 | 0 | -2.318459 | 3.842111  | -0.115592 |
| 31 | 1 | 0 | 0.042552  | 1.148048  | -0.515860 |
| 32 | 8 | 0 | 0.827307  | -1.883391 | -0.511794 |

---



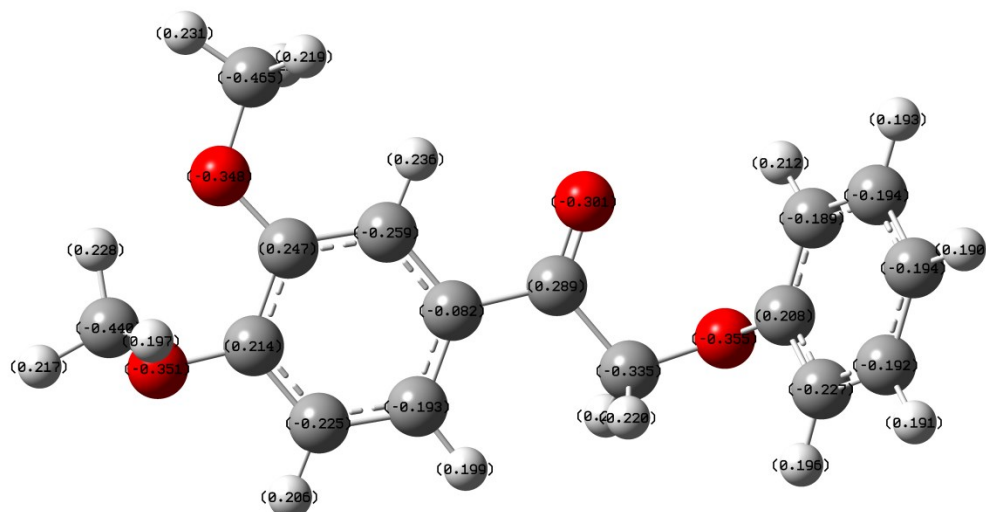

**Fig. S10 Optimized structure and Charge distribution of model 3a.**

Standard orientation:

| Center<br>Number | Atomic<br>Number | Atomic<br>Type | Coordinates (Angstroms) |           |           |
|------------------|------------------|----------------|-------------------------|-----------|-----------|
|                  |                  |                | X                       | Y         | Z         |
| 1                | 6                | 0              | -3.093679               | 0.481053  | -0.030816 |
| 2                | 6                | 0              | -1.765112               | 0.748724  | -0.330828 |
| 3                | 6                | 0              | -0.843535               | -0.287192 | -0.549465 |
| 4                | 6                | 0              | -1.276040               | -1.613109 | -0.465845 |
| 5                | 6                | 0              | -2.601802               | -1.888379 | -0.146144 |
| 6                | 6                | 0              | -3.519094               | -0.866291 | 0.080230  |
| 7                | 1                | 0              | -1.398927               | 1.762717  | -0.421279 |
| 8                | 1                | 0              | -0.596590               | -2.440260 | -0.634777 |
| 9                | 1                | 0              | -2.961744               | -2.908237 | -0.069905 |
| 10               | 6                | 0              | 0.559950                | 0.103585  | -0.876283 |
| 11               | 6                | 0              | 1.577053                | -1.020992 | -1.129144 |
| 12               | 1                | 0              | 1.619217                | -1.679652 | -0.252612 |
| 13               | 1                | 0              | 1.239927                | -1.625272 | -1.976467 |
| 14               | 6                | 0              | 3.708312                | -0.215467 | -0.424143 |
| 15               | 6                | 0              | 4.050642                | 1.118491  | -0.213706 |
| 16               | 6                | 0              | 4.277133                | -1.222212 | 0.356831  |
| 17               | 6                | 0              | 4.969207                | 1.442039  | 0.781760  |
| 18               | 1                | 0              | 3.578785                | 1.876315  | -0.826086 |
| 19               | 6                | 0              | 5.186928                | -0.888007 | 1.358045  |
| 20               | 1                | 0              | 4.025972                | -2.260024 | 0.161493  |
| 21               | 6                | 0              | 5.535865                | 0.443766  | 1.573480  |

|    |   |   |           |           |           |
|----|---|---|-----------|-----------|-----------|
| 22 | 1 | 0 | 5.236968  | 2.481344  | 0.944334  |
| 23 | 1 | 0 | 5.632096  | -1.672739 | 1.961681  |
| 24 | 1 | 0 | 6.248991  | 0.701512  | 2.349674  |
| 25 | 6 | 0 | -3.676236 | 2.799661  | -0.000734 |
| 26 | 1 | 0 | -2.921303 | 3.091962  | 0.735874  |
| 27 | 1 | 0 | -3.298091 | 2.999243  | -1.007985 |
| 28 | 1 | 0 | -4.585758 | 3.373733  | 0.164756  |
| 29 | 6 | 0 | -5.444699 | -0.712050 | 1.507919  |
| 30 | 1 | 0 | -4.819834 | -0.892001 | 2.388694  |
| 31 | 1 | 0 | -5.657729 | 0.351891  | 1.418641  |
| 32 | 1 | 0 | -6.372995 | -1.273214 | 1.604557  |
| 33 | 8 | 0 | -4.810008 | -1.223456 | 0.328580  |
| 34 | 8 | 0 | -4.049595 | 1.435478  | 0.149484  |
| 35 | 8 | 0 | 0.897686  | 1.267018  | -0.945643 |
| 36 | 8 | 0 | 2.857124  | -0.532670 | -1.468363 |

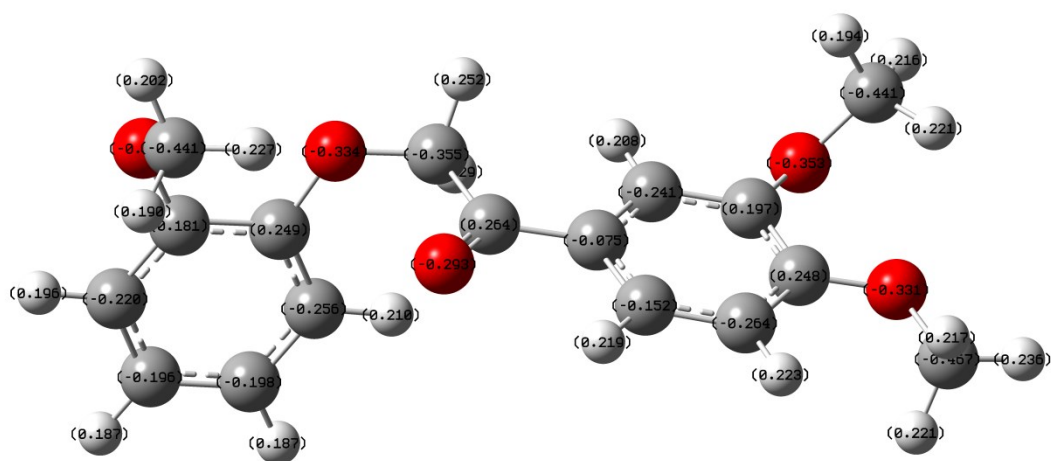

**Fig. S11 Optimized structure and Charge distribution of model 4a.**

Standard orientation:

| Center Number | Atomic Number | Atomic Type | Coordinates (Angstroms) |           |           |
|---------------|---------------|-------------|-------------------------|-----------|-----------|
|               |               |             | X                       | Y         | Z         |
| 1             | 6             | 0           | 3.316629                | 0.443012  | -0.626647 |
| 2             | 6             | 0           | 1.958935                | 0.668433  | -0.476711 |
| 3             | 6             | 0           | 1.215997                | 0.012893  | 0.517223  |
| 4             | 6             | 0           | 1.876902                | -0.871491 | 1.371934  |
| 5             | 6             | 0           | 3.236770                | -1.112768 | 1.233860  |

|    |   |   |           |           |           |
|----|---|---|-----------|-----------|-----------|
| 6  | 6 | 0 | 3.970408  | -0.468088 | 0.232765  |
| 7  | 1 | 0 | 1.505391  | 1.367005  | -1.169422 |
| 8  | 1 | 0 | 1.302559  | -1.370513 | 2.142671  |
| 9  | 1 | 0 | 3.720672  | -1.812695 | 1.902309  |
| 10 | 6 | 0 | -0.241278 | 0.226536  | 0.708674  |
| 11 | 6 | 0 | -0.955749 | 1.181168  | -0.258262 |
| 12 | 1 | 0 | -0.715123 | 0.944247  | -1.300248 |
| 13 | 1 | 0 | -0.602131 | 2.198492  | -0.070357 |
| 14 | 6 | 0 | -3.100105 | 0.157899  | -0.465728 |
| 15 | 6 | 0 | -4.462711 | 0.212682  | -0.116053 |
| 16 | 6 | 0 | -2.626179 | -0.917071 | -1.213412 |
| 17 | 6 | 0 | -5.324140 | -0.783854 | -0.553799 |
| 18 | 6 | 0 | -3.504337 | -1.912651 | -1.644427 |
| 19 | 1 | 0 | -1.575747 | -0.999219 | -1.462329 |
| 20 | 6 | 0 | -4.854578 | -1.844882 | -1.328028 |
| 21 | 1 | 0 | -6.369388 | -0.704182 | -0.276191 |
| 22 | 1 | 0 | -3.118717 | -2.741224 | -2.228635 |
| 23 | 1 | 0 | -5.538651 | -2.615940 | -1.664661 |
| 24 | 6 | 0 | -4.534865 | 1.267252  | 1.988559  |
| 25 | 1 | 0 | -4.954812 | 0.406518  | 2.520522  |
| 26 | 1 | 0 | -3.447452 | 1.249124  | 2.069360  |
| 27 | 1 | 0 | -4.925559 | 2.188292  | 2.419742  |
| 28 | 6 | 0 | 5.990382  | -1.601590 | 0.806969  |
| 29 | 1 | 0 | 5.561810  | -2.602648 | 0.703106  |
| 30 | 1 | 0 | 7.012327  | -1.604329 | 0.435068  |
| 31 | 1 | 0 | 5.985678  | -1.307403 | 1.860897  |
| 32 | 6 | 0 | 4.974761  | 2.015145  | -1.265174 |
| 33 | 1 | 0 | 4.537019  | 2.791599  | -0.628817 |
| 34 | 1 | 0 | 5.802436  | 1.532972  | -0.743840 |
| 35 | 1 | 0 | 5.333118  | 2.463914  | -2.190153 |
| 36 | 8 | 0 | 5.291890  | -0.658754 | 0.003811  |
| 37 | 8 | 0 | 3.978028  | 1.063341  | -1.650986 |
| 38 | 8 | 0 | -4.955786 | 1.258911  | 0.619658  |
| 39 | 8 | 0 | -2.343254 | 1.219771  | -0.047424 |
| 40 | 8 | 0 | -0.862689 | -0.310739 | 1.601257  |

---

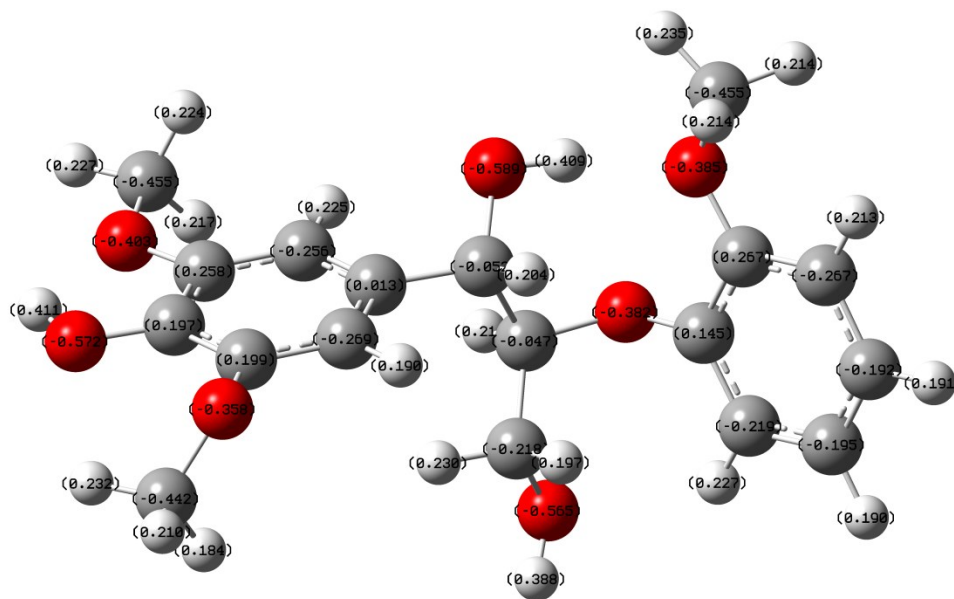

**Fig. S12 Optimized structure and Charge distribution of model 5a.**

Standard orientation:

| Center Number | Atomic Number | Atomic Type | Coordinates (Angstroms) |           |           |
|---------------|---------------|-------------|-------------------------|-----------|-----------|
|               |               |             | X                       | Y         | Z         |
| 1             | 6             | 0           | -3.452153               | -0.900227 | 0.238868  |
| 2             | 6             | 0           | -2.100250               | -1.202525 | 0.296586  |
| 3             | 6             | 0           | -1.178461               | -0.342051 | -0.309240 |
| 4             | 6             | 0           | -1.629331               | 0.802456  | -0.954804 |
| 5             | 6             | 0           | -2.990481               | 1.112121  | -1.014547 |
| 6             | 6             | 0           | -3.914247               | 0.252574  | -0.418728 |
| 7             | 1             | 0           | -1.739170               | -2.107029 | 0.765088  |
| 8             | 1             | 0           | -0.939222               | 1.481296  | -1.443987 |
| 9             | 6             | 0           | 0.294022                | -0.645000 | -0.198745 |
| 10            | 1             | 0           | 0.830786                | -0.094218 | -0.985054 |
| 11            | 6             | 0           | 0.869987                | -0.218416 | 1.171338  |
| 12            | 1             | 0           | 0.354960                | -0.789422 | 1.945926  |
| 13            | 6             | 0           | 3.247027                | -0.000242 | 0.650230  |
| 14            | 6             | 0           | 3.765431                | -0.513079 | -0.554175 |
| 15            | 6             | 0           | 3.832500                | 1.122316  | 1.224402  |
| 16            | 6             | 0           | 4.840612                | 0.123125  | -1.172605 |
| 17            | 6             | 0           | 4.904949                | 1.760002  | 0.602069  |
| 18            | 6             | 0           | 5.403541                | 1.261253  | -0.594730 |
| 19            | 1             | 0           | 5.248697                | -0.263834 | -2.097673 |
| 20            | 1             | 0           | 5.349766                | 2.637500  | 1.058343  |
| 21            | 1             | 0           | 6.240282                | 1.746574  | -1.085495 |

|    |   |   |           |           |           |
|----|---|---|-----------|-----------|-----------|
| 22 | 8 | 0 | -5.253773 | 0.503349  | -0.490262 |
| 23 | 1 | 0 | -5.701724 | -0.226131 | -0.039503 |
| 24 | 8 | 0 | 2.237852  | -0.681921 | 1.289015  |
| 25 | 6 | 0 | 0.698334  | 1.258210  | 1.467293  |
| 26 | 1 | 0 | 1.258504  | 1.861868  | 0.740834  |
| 27 | 1 | 0 | -0.363074 | 1.500009  | 1.360545  |
| 28 | 8 | 0 | 1.143948  | 1.509354  | 2.798438  |
| 29 | 1 | 0 | 0.958912  | 2.431582  | 3.005782  |
| 30 | 8 | 0 | 0.485017  | -2.039613 | -0.362843 |
| 31 | 1 | 0 | 1.436758  | -2.188294 | -0.260939 |
| 32 | 6 | 0 | -4.119701 | -2.885203 | 1.398041  |
| 33 | 1 | 0 | -3.473627 | -2.712822 | 2.264184  |
| 34 | 1 | 0 | -5.056856 | -3.330540 | 1.725692  |
| 35 | 1 | 0 | -3.616757 | -3.558460 | 0.697747  |
| 36 | 8 | 0 | -4.466430 | -1.660390 | 0.768370  |
| 37 | 6 | 0 | 3.463781  | -2.068419 | -2.355176 |
| 38 | 1 | 0 | 2.765065  | -2.874091 | -2.569707 |
| 39 | 1 | 0 | 3.316857  | -1.257539 | -3.074863 |
| 40 | 1 | 0 | 4.489648  | -2.442136 | -2.426087 |
| 41 | 8 | 0 | 3.160862  | -1.639951 | -1.035699 |
| 42 | 6 | 0 | -4.148554 | 3.189691  | -1.009193 |
| 43 | 1 | 0 | -4.246129 | 4.043095  | -1.679028 |
| 44 | 1 | 0 | -5.134441 | 2.799942  | -0.756348 |
| 45 | 1 | 0 | -3.632571 | 3.503198  | -0.094557 |
| 46 | 8 | 0 | -3.368301 | 2.224299  | -1.718403 |
| 47 | 1 | 0 | 3.417909  | 1.478898  | 2.158878  |

---

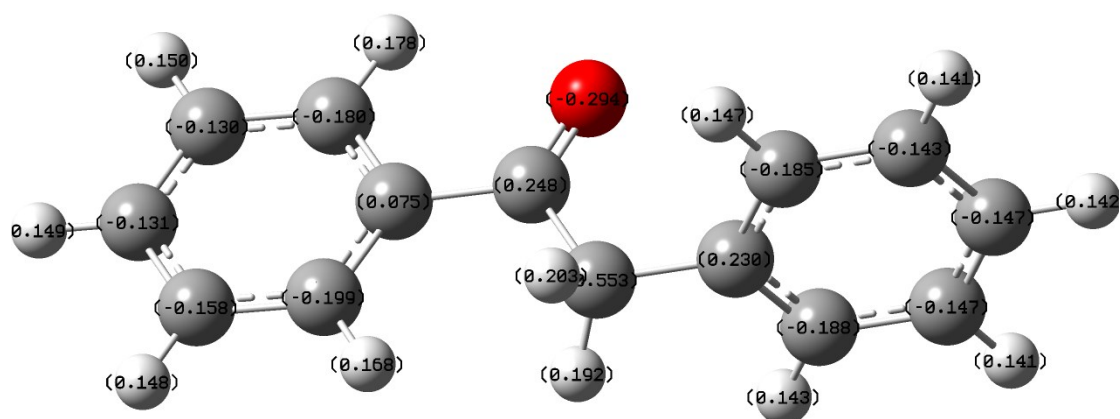

**Fig. S13 Optimized structure and Charge distribution of model 1b.**

Standard orientation:

| Center<br>Number | Atomic<br>Number | Atomic<br>Type | Coordinates (Angstroms) |           |           |
|------------------|------------------|----------------|-------------------------|-----------|-----------|
|                  |                  |                | X                       | Y         | Z         |
| 1                | 6                | 0              | -3.859907               | -1.299611 | 0.284583  |
| 2                | 6                | 0              | -2.479008               | -1.125793 | 0.274914  |
| 3                | 6                | 0              | -1.925154               | 0.126224  | -0.016510 |
| 4                | 6                | 0              | -2.779343               | 1.199806  | -0.298210 |
| 5                | 6                | 0              | -4.156287               | 1.025933  | -0.290851 |
| 6                | 6                | 0              | -4.699724               | -0.225490 | 0.001203  |
| 7                | 1                | 0              | -4.280163               | -2.273217 | 0.512888  |
| 8                | 1                | 0              | -1.840137               | -1.971661 | 0.498635  |
| 9                | 1                | 0              | -2.334177               | 2.162196  | -0.519749 |
| 10               | 1                | 0              | -4.809271               | 1.863554  | -0.511661 |
| 11               | 1                | 0              | -5.776014               | -0.362486 | 0.007831  |
| 12               | 6                | 0              | -0.447817               | 0.381356  | -0.037562 |
| 13               | 6                | 0              | 0.484921                | -0.802961 | 0.241801  |
| 14               | 1                | 0              | 0.227502                | -1.614802 | -0.446092 |
| 15               | 1                | 0              | 0.254076                | -1.181533 | 1.244435  |
| 16               | 6                | 0              | 1.944719                | -0.459489 | 0.127994  |
| 17               | 6                | 0              | 2.650143                | -0.731822 | -1.044474 |

|    |   |   |           |           |           |
|----|---|---|-----------|-----------|-----------|
| 18 | 6 | 0 | 2.613243  | 0.162602  | 1.184171  |
| 19 | 6 | 0 | 3.996711  | -0.396534 | -1.159985 |
| 20 | 1 | 0 | 2.140593  | -1.208633 | -1.876765 |
| 21 | 6 | 0 | 3.958416  | 0.499107  | 1.074477  |
| 22 | 1 | 0 | 2.073017  | 0.390991  | 2.097952  |
| 23 | 6 | 0 | 4.655229  | 0.219179  | -0.099220 |
| 24 | 1 | 0 | 4.530988  | -0.616945 | -2.078394 |
| 25 | 1 | 0 | 4.463442  | 0.981998  | 1.904690  |
| 26 | 1 | 0 | 5.704650  | 0.480544  | -0.186141 |
| 27 | 8 | 0 | -0.011418 | 1.489369  | -0.262703 |

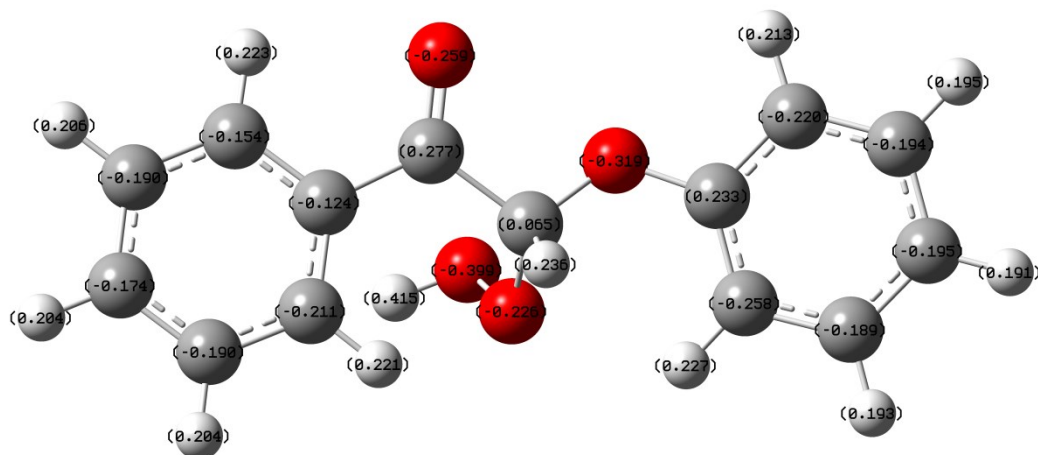

**Fig. S14 Optimized structure and Charge distribution of hydroperoxide intermediate h.**

Standard orientation:

| Center Number | Atomic Number | Atomic Type | Coordinates (Angstroms) |           |           |
|---------------|---------------|-------------|-------------------------|-----------|-----------|
|               |               |             | X                       | Y         | Z         |
| 1             | 6             | 0           | 3.901793                | -1.516573 | -0.685262 |
| 2             | 6             | 0           | 2.604361                | -1.039977 | -0.518476 |
| 3             | 6             | 0           | 2.383080                | 0.312745  | -0.222639 |
| 4             | 6             | 0           | 3.483203                | 1.173540  | -0.105721 |
| 5             | 6             | 0           | 4.775314                | 0.693113  | -0.263004 |
| 6             | 6             | 0           | 4.987496                | -0.654800 | -0.554076 |
| 7             | 1             | 0           | 4.063249                | -2.563214 | -0.919399 |
| 8             | 1             | 0           | 1.773791                | -1.726416 | -0.612924 |

|    |   |   |           |           |           |
|----|---|---|-----------|-----------|-----------|
| 9  | 1 | 0 | 3.295254  | 2.218543  | 0.108360  |
| 10 | 1 | 0 | 5.618958  | 1.367254  | -0.162612 |
| 11 | 1 | 0 | 5.997064  | -1.031186 | -0.680666 |
| 12 | 6 | 0 | 1.024887  | 0.923182  | -0.062619 |
| 13 | 6 | 0 | -0.200131 | -0.025444 | 0.013782  |
| 14 | 6 | 0 | -2.558728 | 0.264143  | 0.042143  |
| 15 | 6 | 0 | -2.867293 | -1.087528 | -0.109598 |
| 16 | 6 | 0 | -3.548550 | 1.236454  | -0.102022 |
| 17 | 6 | 0 | -4.174605 | -1.452944 | -0.431706 |
| 18 | 1 | 0 | -2.115902 | -1.846662 | 0.060996  |
| 19 | 6 | 0 | -4.847737 | 0.856350  | -0.411852 |
| 20 | 1 | 0 | -3.271847 | 2.276318  | 0.025294  |
| 21 | 6 | 0 | -5.166813 | -0.490905 | -0.585266 |
| 22 | 1 | 0 | -4.414418 | -2.504766 | -0.547438 |
| 23 | 1 | 0 | -5.613445 | 1.616478  | -0.525499 |
| 24 | 1 | 0 | -6.181374 | -0.785691 | -0.829610 |
| 25 | 8 | 0 | -1.302850 | 0.739981  | 0.350018  |
| 26 | 8 | 0 | 0.867169  | 2.117882  | -0.022615 |
| 27 | 8 | 0 | 0.028092  | -1.114232 | 0.888332  |
| 28 | 8 | 0 | 0.529899  | -0.584598 | 2.145529  |
| 29 | 1 | 0 | 1.443581  | -0.910748 | 2.122001  |
| 30 | 1 | 0 | -0.351063 | -0.530321 | -0.950711 |

## 5 Supplementary experimental results

### 5.1 Model compound studies

**Table S1** The effect of the amount of base.

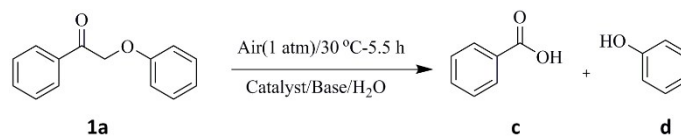

| Entry | NaOH (mmol) | Conversion | Yields (C mol%) |          |
|-------|-------------|------------|-----------------|----------|
|       |             |            | <b>c</b>        | <b>d</b> |
| 1     | 0           | 0.75       | 0               | 0        |
| 2     | 0.1         | 28.76      | 6.32            | 5.53     |
| 3     | 0.2         | 67.58      | 35.96           | 33.64    |
| 4     | 0.4         | 96.96      | 85.12           | 89.03    |
| 5     | 0.5         | 94.24      | 78.40           | 75.41    |



General conditions: **1a** (0.1 mmol), CuCl catalyst (0.05 mmol), H<sub>2</sub>O (2.5 mL), air (1 atm).

**Table S2 the effect of temperature and time on the **1a** reaction.**

| 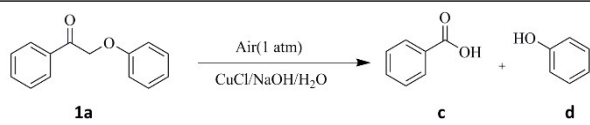 |       |                |                |          |                 |          |
|-------------------------------------------------------------------------------------|-------|----------------|----------------|----------|-----------------|----------|
| Temperature                                                                         | Time  | Conversion (%) | Yields (mol %) |          | Selectivity (%) |          |
|                                                                                     |       |                | <b>c</b>       | <b>d</b> | <b>c</b>        | <b>d</b> |
| 30 °C                                                                               | 0.5h  | 8.11           | 4.09           | 4.54     | 50.43           | 55.98    |
|                                                                                     | 1h    | 23.55          | 15.67          | 16.89    | 66.54           | 71.74    |
|                                                                                     | 2h    | 37.30          | 27.67          | 30.21    | 74.18           | 80.98    |
|                                                                                     | 3h    | 64.69          | 47.39          | 49.38    | 73.26           | 76.33    |
|                                                                                     | 4h    | 77.60          | 63.59          | 69.17    | 81.95           | 89.13    |
|                                                                                     | 5.5h  | 96.96          | 85.12          | 89.03    | 87.79           | 91.83    |
|                                                                                     | 6h    | 100            | 81.45          | 83.31    | 81.45           | 83.31    |
|                                                                                     | 8h    | 100            | 74.30          | 69.65    | 74.30           | 69.65    |
|                                                                                     | 10h   | 100            | 58.36          | 48.39    | 58.36           | 48.39    |
| 30 °C                                                                               |       | 3.53           | 0              | 0        | 0.00            | 0.00     |
| 40 °C                                                                               |       | 33.76          | 14.53          | 17.32    | 43.04           | 51.30    |
| 50 °C                                                                               |       | 49.56          | 32.45          | 27.88    | 65.48           | 56.26    |
| 60 °C                                                                               | 10min | 65.36          | 38.09          | 36.85    | 58.28           | 56.38    |
| 70 °C                                                                               |       | 73.38          | 38.68          | 32.36    | 52.71           | 44.10    |
| 80 °C                                                                               |       | 89.55          | 33.56          | 25.15    | 37.48           | 28.08    |
| 90 °C                                                                               |       | 100            | 22.36          | 16.38    | 22.36           | 16.38    |
| 100 °C                                                                              |       | 100            | 19.55          | 11.39    | 19.55           | 11.39    |

General conditions: **1a** (0.1 mmol), catalyst (0.05 mmol), NaOH (0.4 mmol), water solvent (2.5 mL), air (1 atm).

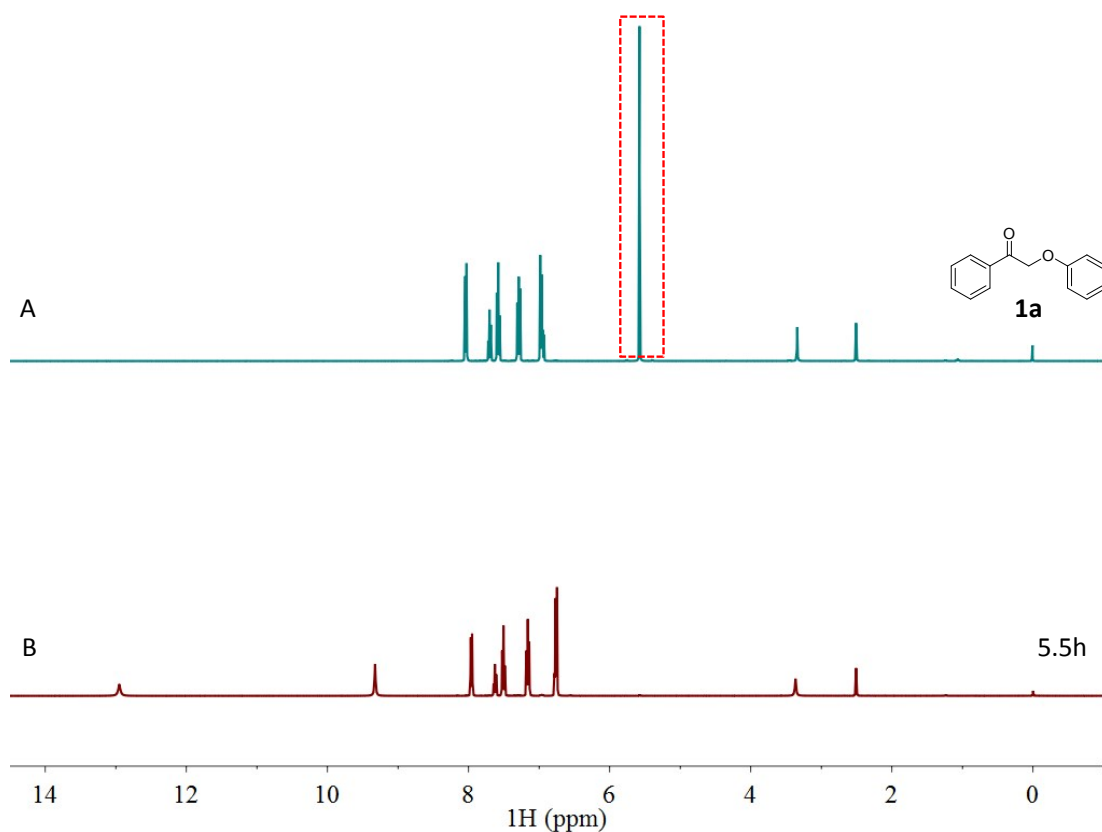

**Fig. S15** <sup>1</sup>H NMR spectra of (A) model 1a and (B) its oxidative products. Conditions: 1a (0.1 mmol), CuCl (0.05 mmol), NaOH (0.4 mmol), H<sub>2</sub>O (2.5 mL), air (1 atm), 30 °C.

## 5.2 The conversion of authentic lignin feedstocks

**Table S3** Main components of different biomass source

| Entry | Biomass source         | Cellulose<br>(wt%) | Hemi-<br>cellulose (wt%) | Acid-soluble<br>Lignin (wt%) | Acid-insoluble<br>lignin (wt%) |
|-------|------------------------|--------------------|--------------------------|------------------------------|--------------------------------|
| 1     | Native corn stover     | 31.73              | 21.31                    | 18.15                        | 2.95                           |
| 2     | Native pine wood       | 43.82              | 23.22                    | 19.08                        | 3.82                           |
| 3     | Native eucalyptus wood | 44.73              | 13.58                    | 19.27                        | 4.63                           |
| 4     | Native bagasse         | 44.49              | 24.20                    | 20.02                        | 2.06                           |
| 5     | Native pennisetum      | 34.41              | 16.98                    | 12.46                        | 2.34                           |
| 6     | Bamboo                 | 34.99              | 19.38                    | 18.36                        | 2.22                           |

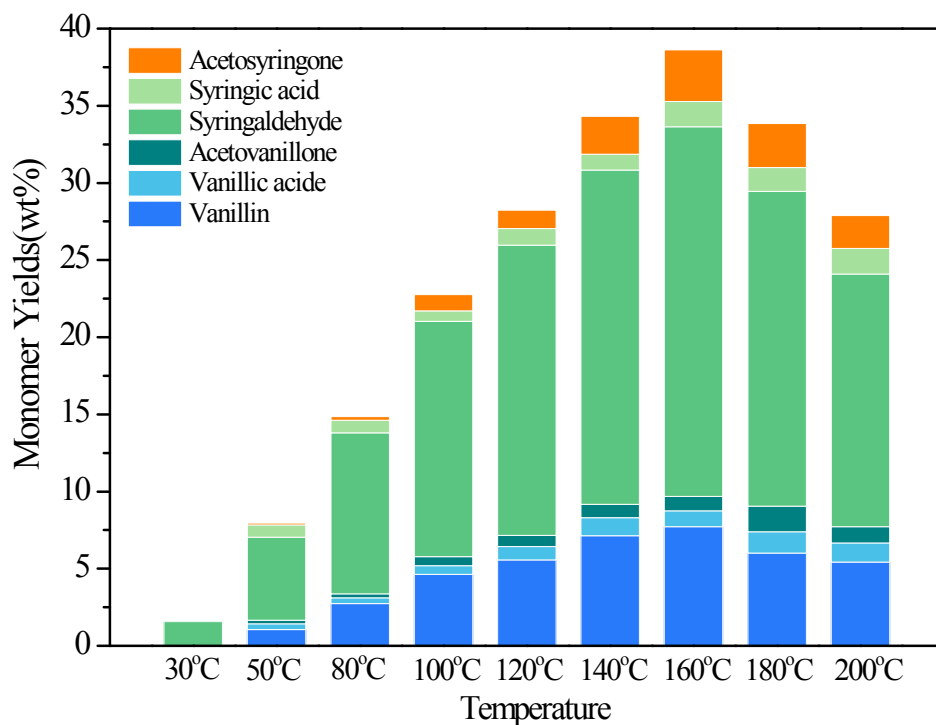

**Fig. S16** Effect of temperature on monomer yields (conditions: 0.5 g eucalyptus wood, 0.5 mmol CuCl, NaOH (15 mmol) and H<sub>2</sub>O (25 mL) as the solvent, 5 bar air pressure.)

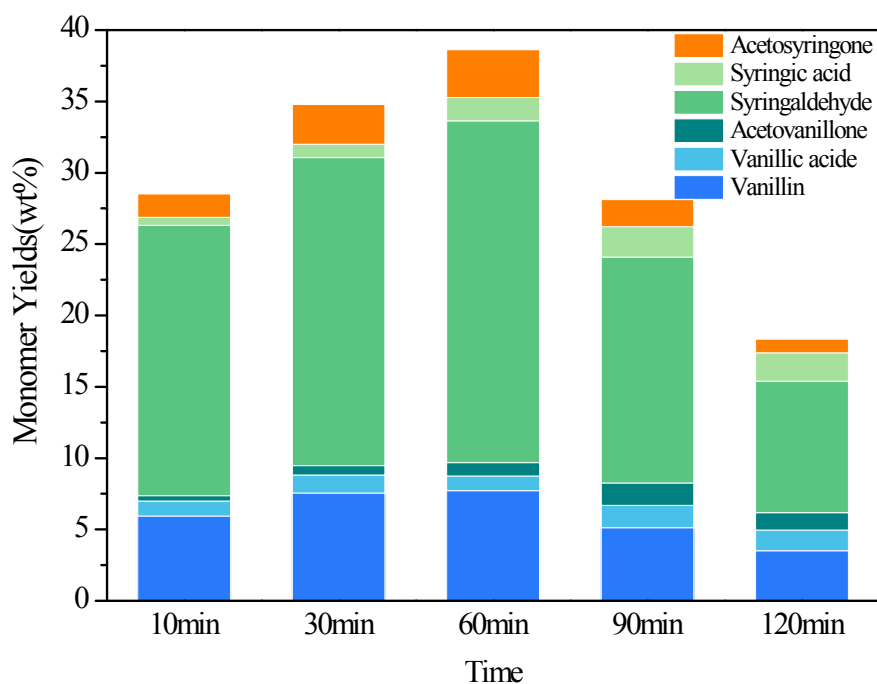

**Fig. S17** Effect of reaction time on monomer yields (conditions: 0.5 g eucalyptus wood, 0.5 mmol CuCl, NaOH (15 mmol) and H<sub>2</sub>O (25 mL) as the solvent, 160 °C, 5 bar air pressure.)

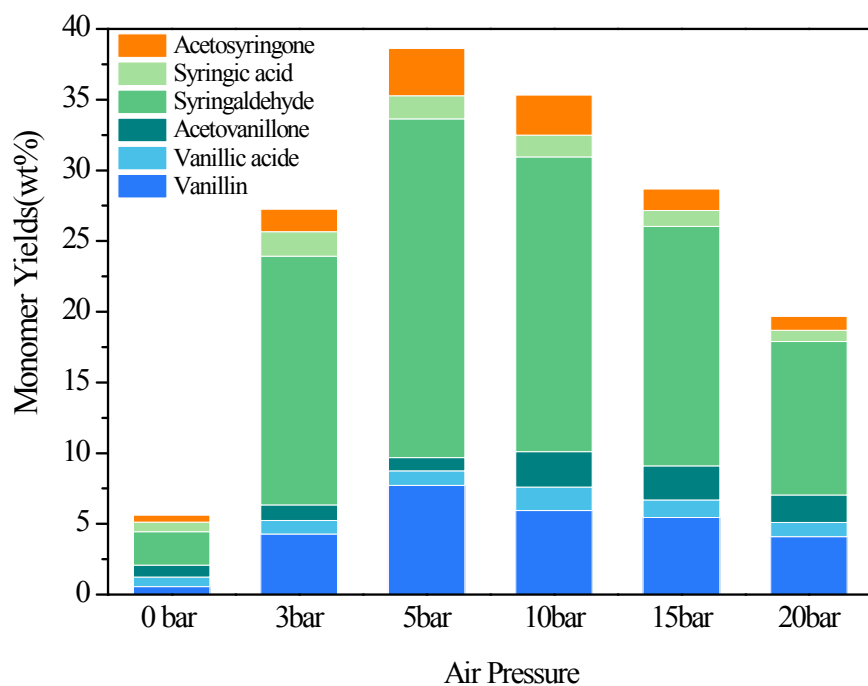

**Fig. S18** Effect of initial air pressure on monomer yields (conditions: 0.5 g eucalyptus wood, 0.5 mmol CuCl, NaOH (15 mmol) and H<sub>2</sub>O (25 mL) as the solvent, 160 °C, 1h.)

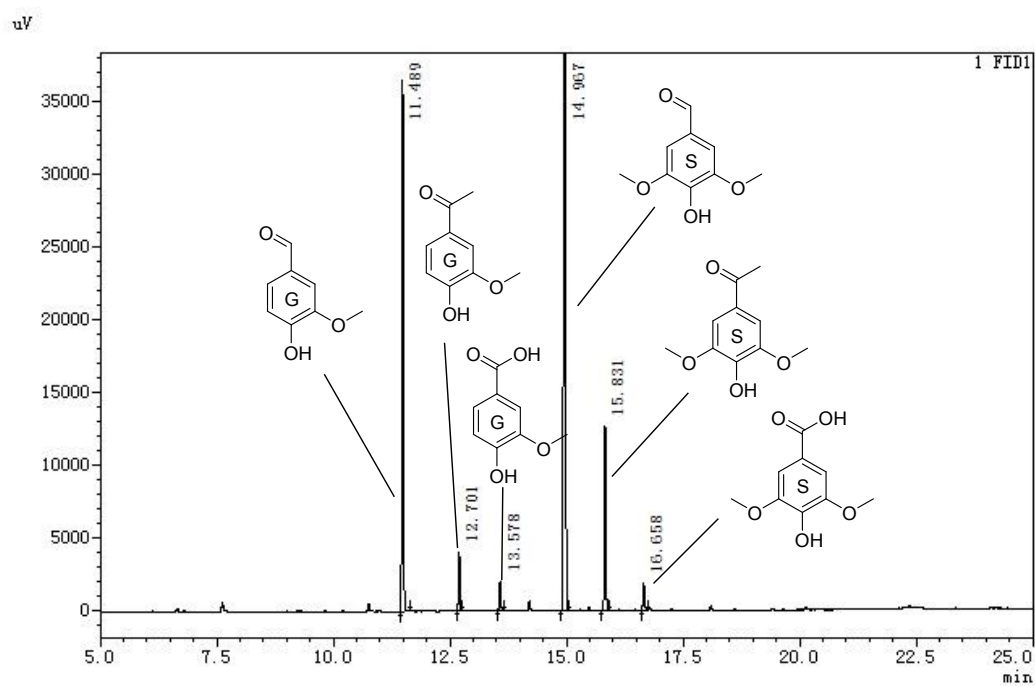

**Fig. S19** Gas chromatogram of the monomeric products from eucalyptus oxidation at 160°C for 1h (5 bar air at RT).

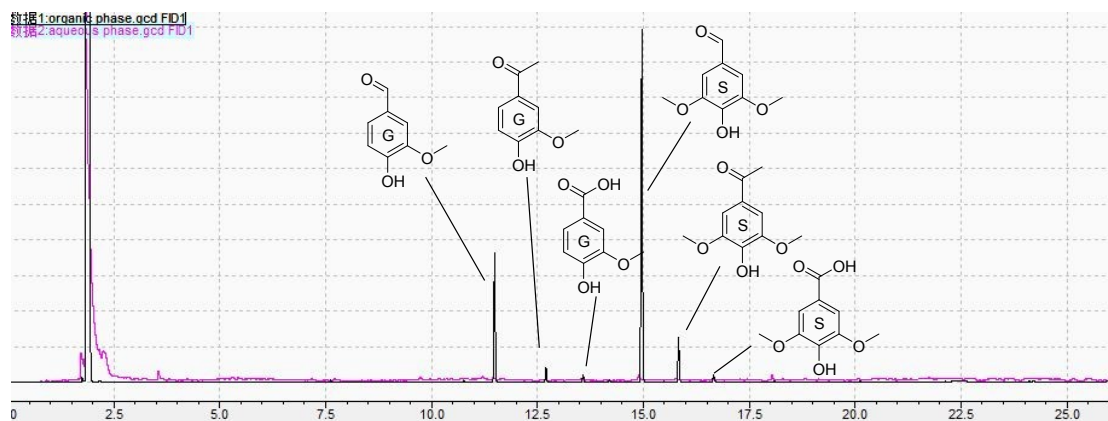

**Fig. S20** GC-FID was performed on the aqueous phase after dichloromethane extraction in a typical eucalyptus wood oxidation experiment. The minor peaks corresponding to lignin monomer compounds in the aqueous phase correspond to ~0.1% monomer yield (versus 38.61% in the organic phase), which is negligible.

**Table S4** The ascription of lignocellulosic residue infrared absorption band

| Entry | Wavenumbers (cm <sup>-1</sup> ) | Assignments and comments                                                       | Ref |
|-------|---------------------------------|--------------------------------------------------------------------------------|-----|
| 1     | 2880                            | C-H stretch in methyl and methylene groups                                     | 3   |
| 2     | 1425                            | C-O-H bending in plane at C-6                                                  | 4   |
| 3     | 1370                            | δC-H                                                                           | 4   |
| 4     | 1160                            | C-O-C at β-glycosidic linkage                                                  | 4   |
| 5     | 1066                            | C-O at C6                                                                      | 4   |
| 6     | 894                             | C-O-C stretching at β-glycosidic linkage. C-O-C, C-C-O, and C-C-H at C5 and C6 | 4   |

**Table S5 Delignification (%) and Hemicellulose Dissolution (%) of different biomass source  
in mild alkaline oxidation reaction**

| Entry | Residue         | Delignification(%) | Hemicellulose<br>Dissolution(%) |
|-------|-----------------|--------------------|---------------------------------|
| 1     | Corn stover     | 91.23              | 67.50                           |
| 2     | Pine wood       | 82.65              | 60.33                           |
| 3     | Eucalyptus wood | 86.67              | 72.23                           |
| 4     | Bagasse         | 83.10              | 61.09                           |
| 5     | Pennisetum      | 89.36              | 74.36                           |
| 6     | Bamboo          | 90.03              | 77.82                           |

#### References

1. A. Sluiter, B. Hames, R. Ruiz, C. Scarlata, J. Sluiter, D. Templeton and D. Crocker, Determination of structural carbohydrates and lignin in biomass, Report NREL/TP-5100-60223, National Renewable Energy Laboratory (NREL), Golden, CO (US), 2008.
2. N. C. Luo, M. Wang, H. J. Li, J. Zhang, T. T. Hou, H. J. Chen, X. C. Zhang, J. M. Lu and F. Wang, *Acs Catal*, 2017, 7, 4571-4580.
3. S. Y. Oh, D. I. Yoo, Y. Shin, H. C. Kim, H. Y. Kim, Y. S. Chung, W. H. Park and J. H. Youk, *Carbohydr Res*, 2005, 340, 2376-2391.
4. G. Vazquez, G. Antorrena, J. Gonzalez and S. Freire, *Holzforschung*, 1997, 51, 158-166.
